# Supplementary material for: Medium optimization based on comparative metabolomic analysis of chicken embryo fibroblast DF-1 cells
Source: Royal Society of Chemistry journal article supplement (doi:10.1039/c9ra05128g), 2019-01-01
Supplement: c9ra05128g1.xlsx [file c9ra05128g1.xlsx]

## Sheet: ProNormImpData
ProNormImpData	Values for each sample are normalized by Bradford protein concentration.
	Each biochemical is rescaled to set the median equal to 1.
	Missing values are imputed with the minimum.
	* indicates compounds that have not been officially confirmed based on a standard, but we are confident in its identity
	** samples without a protein measure (i.e. the media) are lost by this normalization, as well as any compounds that were only detected in these samples
												GROUP	DF-1 in DMEM/F12(1:1) 12 hours (cells)	DF-1 in DMEM/F12(1:1) 12 hours (cells)	DF-1 in DMEM/F12(1:1) 12 hours (cells)	DF-1 in DMEM/F12(1:1) 24 hours (cells)	DF-1 in DMEM/F12(1:1) 24 hours (cells)	DF-1 in DMEM/F12(1:1) 24 hours (cells)	DF-1 in DMEM/F12(1:1) 36 hours (cells)	DF-1 in DMEM/F12(1:1) 36 hours (cells)	DF-1 in DMEM/F12(1:1) 36 hours (cells)	DF-1 in DMEM/F12(1:1) 72 hours (cells)	DF-1 in DMEM/F12(1:1) 72 hours (cells)	DF-1 in DMEM/F12(1:1) 72 hours (cells)	DF-1 in DMEM 12 hours (cells)	DF-1 in DMEM 12 hours (cells)	DF-1 in DMEM 12 hours (cells)	DF-1 in DMEM 24 hours (cells)	DF-1 in DMEM 24 hours (cells)	DF-1 in DMEM 24 hours (cells)	DF-1 in DMEM 36 hours (cells)	DF-1 in DMEM 36 hours (cells)	DF-1 in DMEM 36 hours (cells)	DF-1 in DMEM 72 hours (cells)	DF-1 in DMEM 72 hours (cells)	DF-1 in DMEM 72 hours (cells)
												PROTEIN MG ML	1.97	2.13	1.81	2.33	1.97	2.68	2.23	2.65	2.04	2.61	2.1	2.1	2.23	2.71	2.01	2.1	2.29	2.77	2.9	2.65	2.52	2.39	2.93	2.84
PATHWAY SORTORDER	BIOCHEMICAL	SUPER PATHWAY	SUB PATHWAY	COMP ID	PLATFORM	CHEMICAL ID	RI	MASS	CAS	PUBCHEM	KEGG	Group HMDB	A-12-1	A-12-2	A-12-3	A-24-1	A-24-2	A-24-3	A-36-1	A-36-2	A-36-3	A-72-1	A-72-2	A-72-3	B-12-1	B-12-2	B-12-3	B-24-1	B-24-2	B-24-3	B-36-1	B-36-2	B-36-3	B-72-1	B-72-2	B-72-3
1883	1-(1-enyl-oleoyl)-GPE (P-18:1)*	Lipid	Lysoplasmalogen	44621	LC/MS Neg	100005372	6105.2	462.5					1.0094	0.9665	1.4044	0.9974	1.652	0.8326	2.4055	0.7721	0.8702	1.7433	1.8113	2.1522	0.7494	0.8615	0.3718	0.8943	0.7227	1.0659	0.6738	0.8348	1.09	1.7194	1.0755	1.3923
1881	1-(1-enyl-palmitoyl)-GPE (P-16:0)*	Lipid	Lysoplasmalogen	39270	LC/MS Neg	100003000	6153	436.4					0.5381	0.6405	2.039	0.7447	2.5168	0.6483	2.2907	0.6545	0.7972	2.0638	2.4554	2.2685	0.5886	1.1222	0.2535	0.61	0.5685	0.9351	0.5864	0.9194	0.9832	2.1687	0.8418	1.2461
1885	1-(1-enyl-stearoyl)-GPE (P-18:0)*	Lipid	Lysoplasmalogen	39271	LC/MS Neg	100003001	6500	464.4					0.5426	0.7136	0.67	1.0648	0.8054	0.9024	4.1549	0.8242	0.8361	1.3853	2.3469	5.842	0.5053	0.5053	0.565	0.8637	0.8719	1.0738	1	0.8654	1.1079	3.8277	0.9916	1.1944
1928	1,2-dipalmitoylglycerol	Lipid	Diacylglycerol	11953	GC/MS	850	2600	145	40290-32-2	99931		HMDB07098	1.3194	0.5565	1.1271	0.5565	0.5565	0.6322	0.5565	0.8987	1.3984	0.8477	1.2413	0.5565	0.5565	0.5565	1.5867	0.8142	0.5565	1.5005	0.9863	2.017	1.5243	0.9616	0.626	0.5565
1109	10-heptadecenoate (17:1n7)	Lipid	Long Chain Fatty Acid	33971	LC/MS Neg	100001278	5558	267.3	29743-97-3	5312435		HMDB60038	1.1257	1.1519	1.3995	0.9661	1.2345	0.9427	0.9971	0.8684	1.1167	0.9187	1.3594	0.9407	1.2214	1.0383	1.1593	1.2764	1.2187	0.9052	0.7782	0.8568	0.866	1.0029	1.0241	0.9198
1119	10-nonadecenoate (19:1n9)	Lipid	Long Chain Fatty Acid	33972	LC/MS Neg	100001277	5775	295.4	73033-09-7	5312513		HMDB13622	1.6301	1.0077	1.1713	1.0088	1.0046	0.7878	0.8813	0.9267	1.2335	0.5506	0.9275	0.7731	1.2398	1.1857	1.5158	1.0036	1.2515	1.1762	0.9135	0.9564	0.9565	0.8312	0.9578	0.7994
1800	1-arachidonoyl-GPE (20:4n6)*	Lipid	Lysolipid	35186	LC/MS Neg	100001571	5731	500.3		42607465		HMDB11517	1.6419	1.4058	0.4538	0.91	0.6725	0.8062	0.7593	1.0016	1.1125	0.4538	0.5664	0.711	1.5072	0.8146	1.0373	1.4489	1.6523	1.5525	1.0191	0.9558	0.9984	0.526	0.8043	0.7591
1907	1-oleoylglycerol (18:1)	Lipid	Monoacylglycerol	21184	GC/MS	100000924	2181.2	397.4	111-03-5	5283468		HMDB11567	0.388	0.9693	0.9512	1.037	0.7675	0.5929	1.8069	0.5661	0.4461	0.388	0.7593	1.1214	1.538	1.0911	1.0736	1.0589	1.2086	1.5475	1.7678	0.7894	1.1922	1.6217	0.9108	1.308
1757	1-oleoyl-GPC (18:1)	Lipid	Lysolipid	33960	LC/MS Neg	100001272	6120	596	19420-56-5	16081932		HMDB02815	1.1262	1.4595	1.519	0.8272	1.1467	0.9911	1.1085	0.7329	1.0526	1.0036	1.0737	0.7945	1.2124	0.9176	1.0495	1.0903	0.977	1.0671	0.7535	0.8639	0.934	0.9964	0.9509	1.0345
1792	1-oleoyl-GPE (18:1)	Lipid	Lysolipid	35628	LC/MS Neg	100001569	5928	478.3	89576-29-4	9547071		HMDB11506	0.8281	0.8037	2.0026	0.7549	1.9756	0.7689	1.8181	0.6455	0.5648	2.4209	2.3003	2.1154	0.698	1.6018	0.6025	0.9217	0.8465	1.5669	0.8858	0.889	0.8812	1.776	1.1946	1.3725
1815	1-oleoyl-GPI (18:1)*	Lipid	Lysolipid	36602	LC/MS Neg	100001777	5577	597.4					0.8849	0.9078	0.8402	0.9972	0.9514	0.8843	1.4046	0.9418	1.4173	1.325	1.1104	1.515	0.7106	0.8039	0.7423	1.3539	1.0797	1.2082	0.9598	0.9208	1.0028	1.6493	1.7894	2.2126
1748	1-palmitoyl-GPC (16:0)	Lipid	Lysolipid	33955	LC/MS Neg	100001263	6046	570	17364-16-8	86554		HMDB10382	1.4495	1.6546	1.0524	0.9633	1.0848	1.0676	1.3571	0.8857	0.9683	0.6772	1.1283	0.8942	1.1551	1.014	1.0303	1.0959	1.1998	1.2821	0.7405	0.9644	0.9835	0.775	0.6772	0.9323
1787	1-palmitoyl-GPE (16:0)	Lipid	Lysolipid	35631	LC/MS Neg	100001567	5940	452.3	53862-35-4	9547069		HMDB11503	0.6118	1.1138	1.0784	0.7275	1.1549	0.7059	1.9119	0.6391	0.9546	1.2153	1.5964	1.3162	0.6118	0.8683	0.8158	0.6424	0.719	1.0439	0.9769	1.0956	0.8395	1.1486	0.6253	0.8541
1810	1-palmitoyl-GPI (16:0)*	Lipid	Lysolipid	35305	LC/MS Neg	100001655	5573	571.3				HMDB61695	0.4783	0.4783	0.4783	0.4783	1.2723	0.4783	1.1429	0.9557	0.7753	0.5983	0.4783	0.4783	0.4783	0.5299	0.7726	0.4783	0.4783	0.8406	1.089	0.9542	1.2585	1.0917	1.3533	1.7673
1790	1-stearoyl-GPE (18:0)	Lipid	Lysolipid	34416	LC/MS Neg	100001461	6200	480.4	69747-55-3	9547068		HMDB11130	0.9491	1.0811	0.954	1.0877	1.025	0.8777	3.4004	0.753	0.6681	0.736	1.4893	1.6716	0.5999	0.6688	0.8164	0.9825	1.1269	1.2039	0.7581	0.9984	0.9977	1.5095	0.913	1.1074
1813	1-stearoyl-GPI (18:0)	Lipid	Lysolipid	19324	LC/MS Neg	100000656	5800	599.4	796963-93-4			HMDB61696	0.8909	1.0157	0.7124	0.8641	0.8976	0.8693	1.472	1.0244	1.2175	0.654	0.6626	0.6065	0.8837	0.7547	0.7101	1.3737	1.0528	1.0265	1.0762	1.2064	1.2117	1.3311	1.2995	2.0854
1823	1-stearoyl-GPS (18:0)*	Lipid	Lysolipid	45966	LC/MS Neg	100004327	5798.7	524.4		9547101			1.2078	1.3607	0.6609	0.6708	0.7989	0.9347	0.7584	0.9263	1.065	0.7928	0.871	0.8106	1.1798	0.8201	1.0816	1.3775	1.1674	0.8572	0.9567	1.5649	1.3483	1.534	1.3059	2.099
89	2-aminoadipate	Amino Acid	Lysine Metabolism	6146	GC/MS	381	1686.5	260.1	542-32-5;1118-90-7	469	C00956	HMDB00510	0.6161	0.9001	0.5819	1.0226	0.9619	0.9889	0.628	0.646	1.1998	0.3683	0.24	0.5032	1.7207	1.5015	2.2288	2.3341	1.7213	1.8439	1.5251	1.8642	1.8901	0.9687	0.868	0.5602
345	2-aminobutyrate	Amino Acid	Methionine, Cysteine, SAM and Taurine Metabolism	1577	GC/MS	1128	1215.7	130	1492-24-6	439691	C02261	HMDB00650	0.8122	0.9856	0.5688	1.2389	1.3439	1.0811	0.8031	1	1.2234	0.2079	0.361	0.3875	1.2392	1.1612	1.396	1.3904	1.1829	0.6795	1.0391	1.2519	1.2376	0.9268	0.8546	0.8599
1913	2-arachidonoylglycerol (20:4)	Lipid	Monoacylglycerol	19266	GC/MS	100000584	2214.5	103	53847-30-6	5282280	C13856	HMDB04666	1.8032	1.0268	1.2626	1.2664	1.205	1.0033	1.1672	1.302	0.5907	0.8916	0.9657	0.642	0.8488	0.9803	1.1349	0.9129	0.6985	0.4658	0.9957	1.0803	1.2003	0.8777	0.5849	1.0729
1908	2-oleoylglycerol (18:1)	Lipid	Monoacylglycerol	35848	GC/MS	100000943	2170	410.1	3443-84-3	5319879			0.3171	0.3171	0.3171	0.6626	0.3171	0.3171	0.3171	0.3171	0.8752	1.2411	1.2355	0.3171	0.3171	0.8784	0.3171	0.3171	0.3171	0.3171	0.8231	1.0892	0.3171	0.6383	0.9091	1.6186
891	2-phosphoglycerate	Carbohydrate	Glycolysis, Gluconeogenesis, and Pyruvate Metabolism	35629	GC/MS	100000093	1734	459.1	70195-25-4	59	C00631	HMDB03391	0.3723	0.3723	0.9007	0.3723	0.3723	0.3723	0.3723	0.9376	0.4152	0.3723	0.5135	0.3723	0.7507	1	2.2703	0.3723	1.102	0.3723	0.3723	1.1119	0.3723	0.3723	1.6184	0.3723
134	3-(4-hydroxyphenyl)lactate	Amino Acid	Phenylalanine and Tyrosine Metabolism	1431	GC/MS	240	1823	179	6482-98-0	9378	C03672	HMDB00755	0.7977	0.6165	0.5232	0.7694	1.0211	0.7273	0.8674	0.7183	0.758	1.4161	1.5367	1.4495	1.1052	0.8741	1.1295	1.111	0.7883	1.0021	0.9927	0.906	0.9062	1.5818	1.5472	1.5929
892	3-phosphoglycerate	Carbohydrate	Glycolysis, Gluconeogenesis, and Pyruvate Metabolism	40264	GC/MS	132	1754	357.1	80731-10-8	724	C00597	HMDB00807	1.1139	1.0346	1.0666	1.1156	1.0905	0.5113	1.1879	0.7568	0.5978	0.5473	1.1071	0.7416	1.1563	1.1801	1.2623	0.8524	0.69	0.9561	0.6718	0.9118	0.6145	0.8607	1.0423	1.0563
269	4-methyl-2-oxopentanoate	Amino Acid	Leucine, Isoleucine and Valine Metabolism	22116	LC/MS Neg	100000551	2200	129.2	816-66-0	70	C00233	HMDB00695	0.565	0.565	0.7725	0.565	0.565	0.565	0.565	0.565	0.565	0.565	1.0377	1.2672	0.565	0.565	0.565	0.565	0.9921	1.0079	0.565	0.565	0.565	1.3107	0.565	0.565
103	5-aminovalerate	Amino Acid	Lysine Metabolism	18319	GC/MS	100000454	1620.8	174	660-88-8	138	C00431	HMDB03355	1.0452	0.8837	0.8935	1.2022	1.1059	1.1508	0.9326	0.7874	0.9804	0.3659	0.3553	0.1288	1.3287	1.1162	1.5647	2.1975	1.5787	1.5737	1.9606	1.8648	2.047	0.5113	0.6632	0.4231
410	5-methylthioadenosine (MTA)	Amino Acid	Polyamine Metabolism	1419	LC/MS Pos	212	2427	298.1	2457-80-9	439176	C00170	HMDB01173	0.9814	1.0998	0.889	1.0917	1.1299	0.953	1.1814	0.8783	1.1405	0.8479	0.912	0.9752	0.9409	0.8137	1.0956	1.2068	1.1839	1.1278	0.8712	0.8926	0.8512	1.2093	1.004	1.1907
430	5-oxoproline	Amino Acid	Glutathione Metabolism	1494	LC/MS Neg	1021	744	128.2	98-79-3	7405	C01879	HMDB00267	0.8642	0.8617	0.8269	1.1019	1.2171	1.0292	1.064	1.0319	1.1134	0.443	0.4748	0.4391	1.2844	0.9404	1.1604	1.4728	1.2368	1.0002	0.9874	0.9467	0.9998	0.9332	0.8488	0.9619
901	6-phosphogluconate	Carbohydrate	Pentose Phosphate Pathway	15442	LC/MS Neg	100000341	588	275.1	921-62-0;53411-70-4	91493	C00345	HMDB01316	0.5682	0.5682	0.5682	0.5682	0.5682	0.5682	0.5682	0.5682	0.5682	0.5682	0.5682	0.5682	0.5682	0.5682	0.5682	0.5682	0.5682	0.5682	0.5682	0.5682	0.5682	0.5682	0.5682	0.5682
2044	7-dehydrocholesterol	Lipid	Sterol	40398	GC/MS	264	2330.5	325.3	434-16-2	439423	C01164	HMDB00032	1.0976	1.0624	0.6917	0.431	1.0366	0.1302	0.5516	0.1302	0.344	0.1302	0.5437	0.1302	2.2555	2.1346	1.5788	1.1486	1.6351	0.8475	0.3966	0.5834	1	0.1302	0.1302	0.285
2055	7-ketocholesterol	Lipid	Sterol	34188	GC/MS	100001100	2412	472.4	566-28-9	91474		HMDB00501	1.5831	1.3326	0.4378	0.4378	1.5898	0.4378	1.2857	0.7605	0.4378	0.6202	0.4378	0.4711	0.4378	1.2579	2.7947	1.2007	0.7542	0.6593	0.712	0.4378	0.4378	0.4378	0.4378	0.8807
1326	acetylcarnitine	Lipid	Fatty Acid Metabolism(Acyl Carnitine)	32198	LC/MS Pos	100000802	1203	204.2	5080-50-2	1	C02571	HMDB00201	1.1009	1.186	0.5089	0.8117	0.5089	1.0271	0.9964	0.8019	0.8328	0.5089	0.5089	1.025	1.1803	0.937	1.2713	1.2161	1.4246	1.0986	0.7388	0.7178	1.0334	0.7155	0.7104	0.5732
2856	adenine	Nucleotide	Purine Metabolism, Adenine containing	554	GC/MS	880	1804.2	264	73-24-5	190	C00147	HMDB00034	0.9332	0.9453	0.6823	1.1386	0.9641	0.8313	1.0283	0.7014	0.9583	0.6869	0.7587	0.7545	1.241	1.118	1.3571	1.311	1.037	1.0014	0.9433	0.9498	1.0287	1.1229	1.1578	1.0754
2855	adenosine	Nucleotide	Purine Metabolism, Adenine containing	555	LC/MS Pos	798	1650	268.1	58-61-7	60961	C00212	HMDB00050	0.9415	0.9584	1.0687	1.0004	1.1067	0.8936	1.0386	0.9143	0.8237	1.1526	1.7338	1.155	1.1829	1.0314	1.1553	1.0645	1.0557	0.8788	0.769	0.7749	0.8168	0.9996	1.1803	1.0489
2847	adenosine 5'-diphosphate (ADP)	Nucleotide	Purine Metabolism, Adenine containing	3108	LC/MS Neg	208	700	426.1	20398-34-9	6022	C00008	HMDB01341	1.4805	1.3602	0.9987	1.274	1.2717	1.0041	1.1004	1.0373	0.921	0.711	0.7626	0.8777	0.9701	0.7912	0.8536	1.4073	1.3594	1.1273	0.8254	1.0212	1.023	0.628	0.6832	0.7052
2848	adenosine 5'-monophosphate (AMP)	Nucleotide	Purine Metabolism, Adenine containing	32342	LC/MS Pos	209	1210	348.1	149022-20-8	6083	C00020	HMDB00045	1.5968	1.4104	1.0374	1.0916	1.0581	0.9666	0.8454	0.8453	1.0275	0.7191	0.7389	0.7577	1.1686	0.775	1.2054	1.1645	0.8812	0.8057	0.8391	0.9536	1.0137	0.7664	0.7821	0.8039
2854	adenylosuccinate	Nucleotide	Purine Metabolism, Adenine containing	18360	LC/MS Neg	1303	569	462.1	19046-78-7	195	C03794	HMDB00536	1.2344	1.4021	0.7068	1.3881	0.996	1.3133	0.8912	1.2004	1.7226	0.8281	0.9262	0.5543	1.3805	0.8423	1.2115	1.43	1.2823	1.0055	0.8645	0.8544	0.9052	0.606	0.9388	0.9502
403	agmatine	Amino Acid	Polyamine Metabolism	15496	GC/MS	100000103	1526	174	2482-00-0	199	C00179	HMDB01432	0.062	0.4168	0.7864	1.0773	2.8737	0.062	3.5201	0.8964	0.062	0.3752	0.7362	0.8922	0.062	0.9117	1.3938	0.062	1.6014	2.3734	1.2471	0.8383	0.3598	1.5277	0.9044	1.1662
28	alanine	Amino Acid	Alanine and Aspartate Metabolism	1126	GC/MS	811	1147.6	115.9	56-41-7	5950	C00041	HMDB00161	0.7898	0.8154	0.5923	1.0866	0.9628	0.827	1.0715	0.9366	1.3199	0.7896	0.7816	0.6931	1.2922	1.0014	1.3173	1.4516	1.0611	0.9903	0.986	0.9986	1.1692	1.1421	1.2702	1.2547
2843	allantoin	Nucleotide	Purine Metabolism, (Hypo)Xanthine/Inosine containing	1107	GC/MS	1002	1809.8	518.3	97-59-6	204	C02350	HMDB00462	0.2563	0.2563	0.2563	1.3172	2.0242	0.2563	1.4625	0.2563	1.0689	0.8776	0.2563	0.2563	1.2344	0.885	1.2427	0.7702	0.9312	0.418	1.297	0.7382	1.1169	1.7001	0.5549	0.729
17	allo-threonine	Amino Acid	Glycine, Serine and Threonine Metabolism	15142	GC/MS	100000272	1417.8	219	28954-12-3	99289	C05519	HMDB04041	1.3127	0.7232	0.305	0.305	0.305	0.305	0.305	0.305	1.1642	0.631	0.305	0.305	1.9778	0.7856	1.025	0.305	1.5409	0.305	1.258	0.6923	1.3802	1.1947	0.9104	0.305
1071	alpha-ketoglutarate	Energy	TCA Cycle	33453	GC/MS	93	1779	419.1	305-72-6;328-50-7;22202-68-2	51	C00026	HMDB00208	1.4424	0.714	1.5556	1.2383	1.7904	0.4269	0.4269	0.5784	0.4269	0.8517	0.4269	0.803	0.9077	0.6461	0.481	1.7561	2.5856	0.4269	0.9459	0.4269	1.2611	0.8364	0.8831	0.4269
3016	alpha-tocopherol	Cofactors and Vitamins	Tocopherol Metabolism	1561	GC/MS	1105	2305.4	502.5	59-02-9;10191-41-0	14985	C02477	HMDB01893	0.3574	0.3574	1.1181	0.5354	1.0606	0.3574	0.3574	1.194	0.3574	1.3104	0.3574	0.5176	0.3574	0.3574	0.3574	0.3574	0.8745	0.8967	0.3574	1.0383	0.3574	1	0.9476	1.4236
920	arabinose	Carbohydrate	Pentose Metabolism	575	GC/MS	828	1631.6	217	28697-53-2	66308	C00216	HMDB00646	1.337	0.7405	0.8131	1.6113	1.4736	1.0208	1.5545	0.2496	0.5981	0.9375	0.2496	1.0792	0.9315	0.2496	1.9332	1.3315	0.2496	0.9792	0.928	0.486	0.642	0.9161	1.0612	0.953
925	arabitol	Carbohydrate	Pentose Metabolism	38075	GC/MS	100000012	1687.5	307.1	7643-75-6	94154	C01904	HMDB00568	0.6643	1.6269	0.3068	1.2617	1.8342	0.4153	1.1009	1.3229	1.9372	0.7158	0.3068	0.3068	0.4243	0.9335	0.5781	1.867	1.0046	0.9749	0.7211	1.8088	2.2875	0.4131	1.4994	0.6727
1151	arachidonate (20:4n6)	Lipid	Polyunsaturated Fatty Acid (n3 and n6)	1110	LC/MS Neg	229	5525	303.4	506-32-1	444899	C00219	HMDB01043	1.3531	1.2185	1.4205	0.9767	1.2497	0.8312	1.1863	0.5569	0.5332	0.5339	0.8537	0.6424	0.8237	1.1417	0.7989	1.0836	1.4073	1.5263	0.8565	0.8361	1.1119	0.6702	0.5925	0.5781
366	arginine	Amino Acid	Urea cycle; Arginine and Proline Metabolism	1638	LC/MS Neg	231	728	173.2	1119-34-2	232	C00062	HMDB00517	1.1348	1.0324	1.0168	0.9498	1.0647	0.874	0.8705	0.8644	1.0204	0.7518	0.6731	0.643	1.2099	1.0198	1.3595	1.2662	0.9555	0.7709	1.093	1.0468	1.0163	0.5747	0.5946	0.7559
372	argininosuccinate	Amino Acid	Urea cycle; Arginine and Proline Metabolism	15497	GC/MS	232	2157	446.3	156637-58-0	16950;828	C03406	HMDB00052	0.3224	1.6595	0.3224	0.3224	0.3224	0.8905	0.6865	0.3224	0.9617	0.5645	0.3224	0.3224	1.2631	1.3345	1.1598	1.6508	1	0.653	0.795	0.3224	0.3224	0.3224	0.3224	0.3224
33	asparagine	Amino Acid	Alanine and Aspartate Metabolism	11398	GC/MS	917	1651.2	231	70-47-3	6267	C00152	HMDB00168	1.0405	0.9388	0.7926	1.3631	1.1669	1.0033	1.0412	0.6626	1.3414	0.729	0.7713	0.5886	1.2979	0.9967	1.4655	1.4985	0.8295	1.0591	0.868	0.7246	1.2884	0.9407	0.8571	0.7764
31	aspartate	Amino Acid	Alanine and Aspartate Metabolism	15996	GC/MS	234	1529.7	232	56-84-8	5960	C00049	HMDB00191	0.9474	0.9569	0.8563	1.0904	1.1282	0.9743	1.1788	0.9509	1.3253	0.3093	0.2833	0.2194	1.6079	1.3062	1.7182	1.1388	0.9216	0.8501	1.2671	1.3579	1.6047	0.5702	0.6585	0.642
2938	beta-alanine	Nucleotide	Pyrimidine Metabolism, Uracil containing	55	GC/MS	244	1451.8	174	56-41-7;107-95-9	239	C00099	HMDB00056	0.2861	1.3311	0.9895	1.9606	0.2861	1.2391	0.6453	1.0553	1.4695	1.3611	0.9994	0.8295	1.732	0.7912	0.873	1.776	0.3736	0.4849	0.4188	0.5081	0.7884	0.7126	0.9384	1.4569
6	betaine	Amino Acid	Glycine, Serine and Threonine Metabolism	3141	LC/MS Pos	799	721	118.2	107-43-7	247	C00719	HMDB00043	1.3503	1.1893	1.262	1.1952	1.0711	0.979	1.1104	0.9583	1.2781	0.5992	0.6275	0.5478	0.9988	0.7544	1.1684	0.9449	1.0278	0.703	0.7492	1.0012	0.9154	0.833	0.9197	0.8579
101	cadaverine	Amino Acid	Lysine Metabolism	15308	GC/MS	100000110	1780.4	174	462-94-2;1476-39-7	273	C01672	HMDB02322	1.0136	1.0297	0.6314	1.1465	0.7398	0.9236	0.462	0.7268	0.9864	0.3553	0.2144	0.1793	2.0163	1.4262	1.977	2.9048	2.0482	1.6299	1.3317	1.5578	1.4977	0.7119	0.8949	0.8538
1354	carnitine	Lipid	Carnitine Metabolism	15500	LC/MS Pos	100000007	702	162.2	461-05-2	10917	C00318	HMDB00062	1.221	0.9016	0.4147	0.9764	0.833	1.0236	0.4147	0.7075	0.4147	0.4147	0.4147	0.4147	0.9266	0.4147	0.4147	1.1875	1.1605	1.1002	0.5221	1.1122	1.1703	0.8121	0.4202	0.9745
259	C-glycosyltryptophan	Amino Acid	Tryptophan Metabolism	48782	LC/MS Pos	100006379	1920	367.15	180509-18-6	10981970			1.3538	1.2338	1.0707	1.0064	1.0497	1.07	1.0141	0.8546	1.0514	1.123	1.1909	1.21	1.2309	0.6934	0.8699	0.8739	0.7443	0.8147	0.6341	0.8147	0.8604	1.1916	1.1431	1.4377
2057	cholestanol	Lipid	Sterol	21131	GC/MS	100000859	2320.8	215.2	80-97-7	6665	C12978	HMDB00908	1.0895	1.2963	0.8212	1.2461	1.5994	1.1757	0.9222	0.6486	0.9956	1.0178	1.0552	0.9765	1.104	1.1126	0.8804	1.0499	1.4063	0.8263	0.8068	0.8092	1.0276	0.7005	0.7582	1.2087
2042	cholesterol	Lipid	Sterol	63	GC/MS	266	2316.9	329.3	57-88-5	11025495	C00187	HMDB00067	1.2584	1.3029	0.9683	1.205	1.1598	1.052	1.058	0.8957	1.0957	1.0387	1.1615	1.2323	1.0162	0.8864	1.0599	1.1717	0.9315	0.7838	0.7964	0.8724	0.9307	0.88	0.9319	0.8941
1540	choline	Lipid	Phospholipid Metabolism	15506	LC/MS Pos	1256	674	104.2	67-48-1	305	C00114	HMDB00097	2.7754	2.7835	2.8825	1.0509	1.3577	0.9491	0.9286	0.7414	0.8252	1.2538	1.548	1.2663	2.4445	2.0426	3.0945	0.6923	0.7785	0.6497	0.466	0.6457	0.5549	0.7361	0.598	0.6371
1541	choline phosphate	Lipid	Phospholipid Metabolism	34396	LC/MS Pos	267	695	184.1	72556-74-2	1014	C00588	HMDB01565	0.9953	1.0662	1.0047	1.1073	1.3187	1.0495	1.0952	0.9835	1.2287	0.4006	0.5042	0.3779	0.775	0.6491	0.9113	1.2138	1.1794	0.9302	0.8357	0.966	1.0179	0.5011	0.4589	0.4724
1065	citrate	Energy	TCA Cycle	1564	GC/MS	1124	1763.4	273.1	77-92-9	311	C00158	HMDB00094	2.4662	2.4669	1.8181	1.4951	1.2992	2.3078	1.0014	0.5552	0.7966	1.0196	1.1429	1.1791	0.7378	0.5496	0.8085	2.0889	1.6786	1.3675	0.4738	0.5028	0.467	0.6262	0.5195	0.5489
371	citrulline	Amino Acid	Urea cycle; Arginine and Proline Metabolism	2132	LC/MS Pos	391	715	176.1	372-75-8	9750	C00327	HMDB00904	1.2968	1.204	1.1455	0.7336	0.6667	0.518	0.6666	0.5115	0.5339	0.7793	0.9577	0.774	2.3702	1.9964	2.7948	1.4531	1.5542	1.065	0.7529	0.7722	0.8056	1.0626	1.0695	1.0423
3005	coenzyme A	Cofactors and Vitamins	Pantothenate and CoA Metabolism	2936	LC/MS Neg	270	1600	766.1	85-61-0;18439-24-2	317	C00010	HMDB01423	1.102	1.0698	0.9316	1.037	1.0394	1.2088	1.0423	0.9939	1.1496	0.72	0.7283	0.6192	0.8439	0.6903	0.9171	1.1809	0.9417	0.8085	1.1019	1.0446	1.3578	0.8312	1.0282	1.0061
396	creatine	Amino Acid	Creatine Metabolism	27718	LC/MS Pos	1221	758	132.1	57-00-1	586	C00300	HMDB00064	1.1302	1.042	0.7455	1.2354	1.2974	1.1005	1.0895	0.952	1.2193	0.7059	0.8963	0.5704	1.0239	0.8483	0.9081	1.3017	1.2265	0.9576	0.9759	1.0002	1.0258	0.7658	0.8906	0.8411
397	creatinine	Amino Acid	Creatine Metabolism	513	LC/MS Pos	275	730	114.1	60-27-5	588	C00791	HMDB00562	1.1667	1.0674	0.8649	1.2525	1.0872	1.1079	1.0047	1.0139	1.2746	0.5237	0.6055	0.4753	0.8027	0.6054	1	1.2291	1.0571	0.7438	0.9792	0.9347	1.039	0.7331	0.8561	0.7446
342	cystathionine	Amino Acid	Methionine, Cysteine, SAM and Taurine Metabolism	15705	GC/MS	310	1979.6	218.1	535-34-2	439258	C02291	HMDB00099	1.2482	1.2112	0.8322	1.0336	0.9181	0.7644	0.7555	0.6634	0.9589	0.2002	0.2213	0.1664	1.1513	1.0181	1.4242	1.565	1.1087	1.0681	1.133	1.0219	1.1892	0.6552	0.7932	0.7876
347	cysteine	Amino Acid	Methionine, Cysteine, SAM and Taurine Metabolism	31453	GC/MS	800	1560.1	218	52-90-4;56-89-3	5862	C00097	HMDB00574	1.4463	1.3971	1.1385	0.9556	0.9609	0.9441	1.0136	0.6843	0.9212	0.9444	0.7829	0.8545	0.9312	1.2162	1.5679	1.6781	1.1347	0.9781	1.1336	0.9734	1.1656	0.8462	0.8525	0.986
425	cysteine-glutathione disulfide	Amino Acid	Glutathione Metabolism	35159	LC/MS Pos	100001437	821	427.1	13081-14-6	4247235		HMDB00656	1.0424	0.8673	1.1744	0.9403	0.8252	0.959	1.1738	0.6544	0.9995	1.0005	1.7524	1.0719	0.8915	1.593	1.2995	1.3136	1.0218	0.823	0.6839	0.7545	0.763	1.4897	1.0124	1.2807
428	cysteinylglycine	Amino Acid	Glutathione Metabolism	35637	GC/MS	278	1763	257	19246-18-5	439498	C01419	HMDB00078	2.4546	2.3684	1.8565	0.9077	1.1369	1.2704	1.2402	0.6832	0.9555	0.7261	0.8987	0.84	1.5263	1.29	1.7598	1.4796	1.3118	1.1151	0.7556	0.8956	0.8515	0.5895	0.3999	0.4636
2947	cytidine	Nucleotide	Pyrimidine Metabolism, Cytidine containing	514	LC/MS Pos	827	1065	244	65-46-3	6175	C00475	HMDB00089	1.7924	2.3573	1.8517	0.5963	0.5489	0.6058	0.9035	0.7463	0.6843	1.0071	1.3549	1.0483	3.0114	2.2434	2.7132	1.332	1.255	1.2332	0.571	0.6909	0.606	0.6219	1.0452	0.791
1542	cytidine 5'-diphosphocholine	Lipid	Phospholipid Metabolism	34418	LC/MS Pos	1220	777	489.1	33818-15-4	13804	C00307	HMDB01413	1.2287	0.9977	0.9949	0.9577	1.0388	0.8327	1.104	0.829	1.0615	0.8366	1.064	0.7252	2.8655	2.6448	2.6363	1.269	1.3833	0.9447	0.6833	0.6304	0.7326	0.9002	0.8851	0.7978
2944	cytidine 5'-monophosphate (5'-CMP)	Nucleotide	Pyrimidine Metabolism, Cytidine containing	2372	LC/MS Pos	282	887	324	63-37-6	6131	C00055	HMDB00095	2.5756	2.4868	2.2729	0.8075	0.7648	0.7403	1.156	0.9417	1.2178	0.7622	0.8184	0.8026	1.6663	1.3949	1.6738	1.2042	0.974	0.8668	0.9007	0.8249	0.9104	0.9794	0.999	1.0496
1548	cytidine-5'-diphosphoethanolamine	Lipid	Phospholipid Metabolism	34410	LC/MS Pos	100001407	765	447	72842-05-8	123727	C00570	HMDB01564	1.6288	1.047	1.3047	0.8894	1.1024	0.8509	0.8952	0.96	1.2157	0.6269	0.8412	0.6486	2.1732	2.0207	2.2866	1.0032	0.9305	0.6675	0.8072	1.1429	0.9471	1.1994	1.0155	0.9968
1353	deoxycarnitine	Lipid	Carnitine Metabolism	36747	LC/MS Pos	100001662	759	146.1	6249-56-5	134	C01181	HMDB01161	1.4409	1.3535	0.8225	1.1831	1.0498	0.6909	1.0797	0.792	1.1692	0.7325	0.8769	1.2469	1.1899	1.0967	1.6997	1.151	1.1369	0.85	0.7399	0.8359	1.055	0.5942	0.6192	0.8168
2041	desmosterol	Lipid	Sterol	6065	GC/MS	306	2329.1	129.1	313-04-2	439577	C01802	HMDB02719	1.639	1.8267	1.3795	1	1.0111	1.0867	0.76	0.4868	0.6224	0.1361	0.192	0.1375	1.7965	1.4776	1.8265	2.0097	1.76	1.4145	0.8682	0.8599	0.9415	0.2577	0.2013	0.1063
1155	dihomo-linoleate (20:2n6)	Lipid	Polyunsaturated Fatty Acid (n3 and n6)	17805	LC/MS Neg	1231	5722	307.3	2091-39-6	6439848	C16525	HMDB05060	1.0591	0.6488	0.8469	0.9642	0.8341	0.7472	1.0058	0.9193	1.2083	1.1078	1.3794	1.0946	0.9426	0.9242	0.9647	0.8783	1.0947	0.9522	0.9931	0.8463	1.0421	1.5386	2.1151	1.6579
1150	dihomo-linolenate (20:3n3 or n6)	Lipid	Polyunsaturated Fatty Acid (n3 and n6)	35718	LC/MS Neg	100001739	5600	305.4	17046-59-2	5280581	C03242	HMDB02925	1.1626	1.0688	1.4434	0.9907	1.3755	0.7554	1.2583	0.58	0.8068	0.6212	0.605	0.6183	1.0584	1.3168	1.13	1.2567	1.3416	1.3524	1.0393	1.0454	0.9435	0.5984	0.4547	0.5314
887	dihydroxyacetone phosphate (DHAP)	Carbohydrate	Glycolysis, Gluconeogenesis, and Pyruvate Metabolism	15522	GC/MS	309	1737	315.1	102783-56-2	668	C00111	HMDB01473	1.5112	1.6089	1.7437	0.9588	1.2405	1.2993	1.1012	0.9393	0.8767	0.3646	0.1838	0.3372	1.4938	2.0032	2.0083	1.4081	1.0239	0.832	0.9457	0.458	1.3182	0.6439	0.5251	0.8806
1154	docosadienoate (22:2n6)	Lipid	Polyunsaturated Fatty Acid (n3 and n6)	32415	LC/MS Neg	100001182	6017	335.4	7370-49-2	5282807	C16533	HMDB61714	0.9747	0.7387	1.1191	0.952	0.9021	0.694	0.6164	0.846	1.063	1.5753	1.0434	1.4039	1.3798	0.997	1.1328	1.2101	1.1595	1.1453	0.5605	0.6864	1.1376	0.9161	1.723	1.046
1142	docosahexaenoate (DHA; 22:6n3)	Lipid	Polyunsaturated Fatty Acid (n3 and n6)	19323	LC/MS Neg	100000665	5518	327.3	6217-54-5	445580	C06429	HMDB02183	1.3192	1.1917	1.4305	1.0615	1.1656	0.9146	1.3139	0.6935	0.7672	0.7454	1.0856	0.7855	1.0073	0.9421	0.9168	0.9839	1.3618	1.3616	1.0235	0.957	1.0589	0.7569	0.7977	0.7856
1141	docosapentaenoate (n3 DPA; 22:5n3)	Lipid	Polyunsaturated Fatty Acid (n3 and n6)	32504	LC/MS Neg	100001181	5574	329.4	2234-74-4	6441454	C16513	HMDB01976	1.3303	1.0525	1.117	1.0541	1.3156	0.8109	1.281	0.6845	0.7646	0.6003	1.0851	0.4863	1.0075	1.0889	0.9287	1.1338	1.2127	1.3583	0.8605	0.9082	1.0299	0.9172	0.7514	0.6806
1124	eicosenoate (20:1)	Lipid	Long Chain Fatty Acid	33587	LC/MS Neg	100001335	5955	309.4		5282768		HMDB02231	1.107	0.6421	1.063	0.8035	1.1148	0.955	0.928	0.997	0.9544	1.2504	1.4123	1.179	0.9564	0.9917	0.9966	0.9658	0.8754	0.9157	1.003	0.6007	1.0808	1.0101	1.5479	1.0054
1129	erucate (22:1n9)	Lipid	Long Chain Fatty Acid	1552	LC/MS Neg	1087	6273.3	337.4	112-86-7	5281116	C08316	HMDB02068	1.0297	0.8943	1.1129	0.9853	0.8796	0.8885	1.0921	0.9221	0.9166	1.1314	1.4707	2.0539	0.9543	0.8376	1.029	0.8289	0.9373	0.7018	0.7926	1.0147	1.1787	1.1419	1.0553	1.028
1058	erythronate*	Carbohydrate	Aminosugar Metabolism	33477	GC/MS	100001320	1546.9	292.1	88759-55-1	2781043		HMDB00613	1.0631	1.1421	0.7593	1.1793	1.0943	0.9263	1.4731	0.9179	1.2944	0.9217	0.9667	0.7851	0.8381	0.6104	1.3869	1.5248	0.9892	0.8687	1.0204	1.011	1.0248	0.774	1.1148	0.9283
1546	ethanolamine	Lipid	Phospholipid Metabolism	34285	GC/MS	420	1074	102	141-43-5	700	C00189	HMDB00149	1.0449	1.2182	0.9344	0.8047	1.1258	0.7407	0.9175	0.5801	0.8331	0.9558	1.3237	1.1913	0.6975	0.9718	1.1017	1.3044	0.8996	1.0449	0.8611	0.7361	0.9967	1.5158	1.0258	1.0027
984	fructose	Carbohydrate	Fructose, Mannose and Galactose Metabolism	577	GC/MS	878	1758	217	57-48-7	5984	C00095	HMDB00660	1.8843	1.1931	1.7641	0.5891	0.759	0.937	0.7378	0.4602	1.0293	1.9211	1.4314	1.4526	1.1411	1.7757	2.0701	1.1658	0.9232	1.258	0.6837	0.8325	0.9168	0.7443	0.4392	0.4392
985	fructose 1-phosphate	Carbohydrate	Fructose, Mannose and Galactose Metabolism	15909	GC/MS	100000253	1983.1	445.2	53823-70-4	65246	C01094	HMDB01076	1.3954	2.3708	0.8661	0.6189	0.2435	0.2435	0.2435	0.2435	0.2435	0.2435	0.2435	0.2435	0.2435	0.2435	0.2435	0.2435	0.6693	0.9062	0.8605	0.2435	0.2435	0.2435	0.2435	0.2435
1075	fumarate	Energy	TCA Cycle	1643	GC/MS	330	1382.1	245	100-17-8	444972	C00122	HMDB00134	1.0714	1.0667	0.8142	1.2832	1.1928	0.881	1.7686	1.0113	1.3636	0.6725	0.6777	0.5038	0.8014	0.7536	0.899	1.3439	1.1153	0.9865	1.0737	0.9281	1.1332	0.9903	0.8907	1.0039
999	galactose	Carbohydrate	Fructose, Mannose and Galactose Metabolism	12055	GC/MS	287	1793.8	203.9	59-23-4	3037556	C01582	HMDB00143	1.1469	0.9844	0.8373	1.3818	0.8363	1.2463	0.5625	1.0543	1.3491	0.3409	0.5855	0.3409	1.0361	1.0219	2.2932	2.139	0.8731	1.0573	0.5684	0.3409	1.2745	0.6859	0.6375	1.121
47	gamma-aminobutyrate (GABA)	Amino Acid	Glutamate Metabolism	1416	GC/MS	141	1539.7	304.1	56-12-2	119	C00334	HMDB00112	7.4063	8.0124	3.8799	5.6581	3.1279	5.1001	0.8827	0.8697	1.4318	0.1313	0.2862	0.1	1.1939	1.0084	0.7633	1.1339	1	0.8166	0.6181	0.6499	0.9266	0.1692	0.1	0.1008
438	gamma-glutamylalanine	Peptide	Gamma-glutamyl Amino Acid	37063	LC/MS Pos	100001843	1108	219	5875-41-2	440103		HMDB29142	0.4416	0.5817	0.4416	1.1883	0.8662	1.1577	1.2519	1.0287	1.4137	0.5974	0.4818	0.4416	0.9643	0.8727	0.8232	1	0.9126	0.7813	1.1694	1.2068	1.4172	1.4053	2.0279	1.8588
439	gamma-glutamylcysteine	Peptide	Gamma-glutamyl Amino Acid	1778	LC/MS Pos	1036	1274	251.1	636-58-8	842	C00669	HMDB01049	0.9344	0.8754	0.7239	1.0082	0.9017	1.0423	1	0.6474	1.2333	0.3988	0.3862	0.5162	1.7014	1.1784	1.5398	1.2814	1.1001	0.8425	0.9947	1.0665	1.1618	0.5402	0.6041	0.7249
444	gamma-glutamylisoleucine*	Peptide	Gamma-glutamyl Amino Acid	34456	LC/MS Pos	100001485	2644	261.2		14253342		HMDB11170	0.8238	0.7267	0.6524	0.8679	0.9479	0.7021	0.7332	0.6196	1.0929	0.5917	0.5917	0.5917	2.0305	1.4909	2.0911	1.5634	1.7301	1.461	1.1929	1.3924	1.775	0.8442	0.9137	0.8227
445	gamma-glutamylleucine	Peptide	Gamma-glutamyl Amino Acid	18369	LC/MS Pos	1268	2744	261.2	2566-39-4	151023		HMDB11171	0.5611	0.608	0.5293	1.0186	1	0.9972	1.0037	0.8032	0.9213	0.3453	0.3453	0.3453	2.4814	1.9087	2.6183	2.011	1.7816	1.5144	1.5668	1.5713	1.9032	0.6017	0.7298	0.7095
450	gamma-glutamylthreonine*	Peptide	Gamma-glutamyl Amino Acid	33364	LC/MS Pos	100001314	977	249.1	5652-48-2			HMDB29159	0.842	0.7897	0.5603	1.1615	1.0038	1.1015	0.9962	0.8105	1.0342	0.2132	0.2347	0.157	1.9553	1.6155	2.0347	1.9204	1.4146	1.2723	1.3133	1.3763	1.4749	0.7976	0.7933	0.8535
453	gamma-glutamylvaline	Peptide	Gamma-glutamyl Amino Acid	32393	LC/MS Pos	100001126	2040	247.2	2746-34-1	7015683		HMDB11172	0.5167	0.5488	0.5105	0.9375	0.8869	0.853	0.8149	0.9212	0.9133	0.2429	0.1891	0.1765	1.999	1.48	2.0353	1.7534	1.6337	1.3351	1.4583	1.2226	1.4881	0.6365	0.8321	0.8879
3293	gluconate	Xenobiotics	Food Component/Plant	587	GC/MS	338	1879.4	333	527-07-1	10690	C00257	HMDB00625	0.7968	1.2484	0.7889	1.4946	0.9441	1.1894	1.3471	1.1898	1.7281	0.8128	0.7896	0.5153	1.0143	0.8427	0.9238	1.5876	0.955	0.8965	0.906	1.0735	0.9832	0.8158	1.2173	1.1102
878	glucose	Carbohydrate	Glycolysis, Gluconeogenesis, and Pyruvate Metabolism	20488	GC/MS	572	1866.8	217.1	50-99-7	79025	C00031	HMDB00122	2.3251	2.5598	1.9918	1.3781	0.5825	1.0829	0.703	0.5442	1.463	1.1989	1.0905	1.3393	0.7721	1.7495	2.5018	1.9188	0.6641	0.3282	0.9143	0.3221	0.4236	0.5835	0.4755	0.5191
879	glucose 6-phosphate	Carbohydrate	Glycolysis, Gluconeogenesis, and Pyruvate Metabolism	31260	GC/MS	291	2042.7	387.2	103192-55-8	5958	C00668	HMDB01401	1.7122	1.6371	1.874	1.3599	1.7234	1.107	1.0429	0.7787	0.5878	0.3272	0.3066	0.3511	1.3787	1.8821	2.2603	1.4614	0.9892	0.8019	0.5988	0.9117	0.8879	0.6069	0.5552	0.4448
1035	glucuronate	Carbohydrate	Aminosugar Metabolism	15443	GC/MS	100000257	1888	217	207300-70-7	444791	C00191	HMDB00127	1.1729	1.1804	0.8482	1.2055	1.1112	0.9613	1.1924	0.7645	1.4934	1.0028	0.9391	0.7195	0.7643	0.6194	0.9006	1.513	1.1272	0.9037	0.9576	0.9092	0.9033	1.3421	1.156	1.3379
42	glutamate	Amino Acid	Glutamate Metabolism	57	LC/MS Pos	561	700	148.1	56-86-0	611	C00025	HMDB00148	1.3007	1.2587	1.1714	1.1557	1.19	0.8998	0.994	0.8838	1.006	0.6198	0.7007	0.6054	1.0265	0.8132	1.1696	1.0971	1.2119	0.8477	0.8094	0.9579	1.071	0.6064	0.6037	0.5309
43	glutamine	Amino Acid	Glutamate Metabolism	53	LC/MS Pos	563	684	147.2	56-85-9	5961	C00064	HMDB00641	1.2316	1.2732	1.0779	0.9598	1.1006	0.8502	0.8377	0.7023	0.9523	0.0768	0.1361	0.1327	1.2849	1.1121	1.5026	1.3388	1.1855	0.9161	1.0622	1.2612	1.3299	0.4365	0.3152	0.3274
423	glutathione, oxidized (GSSG)	Amino Acid	Glutathione Metabolism	27727	LC/MS Pos	448	1535	613.1	103239-24-3	65359	C00127	HMDB03337	2.1069	2.496	2.5757	0.617	1.2107	0.898	0.748	0.6183	0.8275	0.5165	1.2792	0.6943	1.3977	1.5459	1.7269	1.3929	0.9462	1.0699	0.5475	0.936	0.6644	0.6643	0.512	0.5388
422	glutathione, reduced (GSH)	Amino Acid	Glutathione Metabolism	2127	LC/MS Pos	496	1274	308.1	70-18-8	124886	C00051	HMDB00125	2.1949	1.9449	1.7543	0.8501	0.8459	0.8459	0.8694	0.7966	0.9686	0.5845	0.7123	0.6723	1.6484	1.3756	1.7769	1.3035	1.1406	0.9942	0.9263	1.0107	1.0058	0.4217	0.4303	0.5022
1889	glycerol 3-phosphate	Lipid	Glycerolipid Metabolism	15365	GC/MS	100000258	1719.7	357.1	29849-82-9	754	C00093	HMDB00126	3.529	3.43	2.7267	1.5927	1.3626	1.0206	0.9564	0.527	0.7787	0.6665	0.8523	0.8474	3.8948	3.5902	4.0463	1.482	1.2537	1.178	0.6603	0.6986	0.6656	0.5911	0.7073	0.6888
1894	glycerophosphoglycerol	Lipid	Glycerolipid Metabolism	48857	GC/MS	100001619	1969	357.3		439964	C03274		0.3204	0.4909	0.8811	0.9404	1.2315	0.8027	1.7473	0.3204	0.4544	0.9083	1.8392	2.1584	0.7152	0.855	1.7951	1.1261	0.3204	1.5083	0.3204	0.682	0.8108	2.5193	0.3204	1.5727
1543	glycerophosphorylcholine (GPC)	Lipid	Phospholipid Metabolism	15990	LC/MS Pos	100000269	694	258.1	28319-77-9	71920	C00670	HMDB00086	4.0036	3.941	3.7545	1.2571	1.5042	1.2247	0.5783	0.483	0.6003	0.8031	0.9436	0.9851	4.3842	3.3685	4.7103	1.1092	1.3659	1.0149	0.3655	0.4439	0.4982	0.6087	0.7052	0.6129
1	glycine	Amino Acid	Glycine, Serine and Threonine Metabolism	11777	GC/MS	340	1166	101.9	56-40-6	750	C00037	HMDB00123	0.7504	0.7907	0.5451	1.1362	1.1413	0.988	1.2184	0.8495	1.2419	0.6284	0.7594	0.543	1.1292	0.9847	1.278	1.3398	0.9832	0.8674	1.4155	1.2615	1.5452	1.5747	1.6378	1.8021
595	glycylleucine	Peptide	Dipeptide	34398	LC/MS Pos	100001258	2236	189.1	869-19-2	92843	C02155	HMDB00759	0.4412	1.4757	1.5252	0.691	0.4412	0.4412	0.8625	1.3994	1	1.2825	0.6779	1.1771	0.5563	0.9018	0.5216	1.1033	0.4412	1.0428	0.8136	0.7406	0.8403	0.9779	0.9456	1.0763
2889	guanine	Nucleotide	Purine Metabolism, Guanine containing	32352	LC/MS Pos	172	1022	152.1	73-40-5	764	C00242	HMDB00132	0.5034	0.6363	0.6043	0.7256	0.6526	0.519	1.7433	0.8834	1.3217	1.7469	1.8994	1.5225	0.8836	0.4805	0.9479	1.1781	1.0185	1.1326	0.7941	0.4713	0.5723	1.1515	1.283	1.3979
2888	guanosine	Nucleotide	Purine Metabolism, Guanine containing	1573	LC/MS Neg	1099	1675	282.1	118-00-3	6802	C00387	HMDB00133	0.7055	0.808	0.7649	1.2591	1.0363	1.049	1.1432	1.1931	1.326	1.0078	1.0893	0.975	1.0664	0.6988	0.8676	1.5254	1.2642	1.064	0.6868	0.629	0.5758	0.5775	0.9214	0.917
2883	guanosine 5'- monophosphate (5'-GMP)	Nucleotide	Purine Metabolism, Guanine containing	2849	LC/MS Pos	347	1300	364	5550-12-09	6804	C00144	HMDB01397	1.2666	1.2997	1.0935	0.9997	1.201	0.9184	0.9632	0.8954	1.0003	0.867	1.0614	0.912	1.2188	0.9368	1.2174	1.0601	0.9127	0.8287	0.8733	0.9922	1.0516	0.9181	0.815	0.9823
61	histidine	Amino Acid	Histidine Metabolism	59	LC/MS Neg	355	757	154.1	5934-29-2	6274	C00135	HMDB00177	1.3845	1.0736	1.0043	0.99	0.9917	0.8339	0.9071	0.743	1.0414	0.6083	0.6979	0.5915	1.5622	1.2734	1.5794	1.0446	0.9991	0.7461	1.1102	1.0757	1.2978	0.7646	0.7427	0.8432
339	homocysteine	Amino Acid	Methionine, Cysteine, SAM and Taurine Metabolism	40266	GC/MS	311	1648.2	234	454-29-5	778	C00155	HMDB00742	0.9453	1.3538	0.403	0.403	1.5159	0.403	0.403	0.8868	1.0063	0.403	0.587	0.5569	0.403	1.0398	0.5101	1.938	0.403	0.403	0.7006	1.0515	1.0617	0.403	0.8455	0.9199
357	hypotaurine	Amino Acid	Methionine, Cysteine, SAM and Taurine Metabolism	590	GC/MS	358	1598.5	188	300-84-5	107812	C00519	HMDB00965	0.392	1.1818	0.392	1.2554	1.1876	1.1263	0.9082	0.4263	1.3646	0.5849	0.6892	0.392	1.7761	1.3558	1.8778	0.7008	0.4208	0.8259	0.7985	1.9605	1	0.9663	0.392	1.3304
2834	hypoxanthine	Nucleotide	Purine Metabolism, (Hypo)Xanthine/Inosine containing	3127	LC/MS Neg	171	1313	135.1	68-94-0	790	C00262	HMDB00157	0.159	0.159	0.159	1.3582	1.2265	1.0187	1.5807	1.0998	1.1771	0.9568	0.9868	0.7333	0.5327	0.3104	0.159	0.9921	1	1.1648	0.4663	0.2747	0.159	0.817	1.2814	1.0997
221	indolelactate	Amino Acid	Tryptophan Metabolism	18349	GC/MS	100000463	1964.9	202	832-97-3	92904	C02043	HMDB00671	0.3953	0.9535	0.9203	0.9162	0.3953	0.3953	0.7854	0.5819	0.8483	3.3591	3.1062	2.8377	0.3953	0.3953	1.0112	0.3953	0.3953	0.9422	0.3953	0.3953	0.3953	1.6106	1.4886	1.7946
2833	inosine	Nucleotide	Purine Metabolism, (Hypo)Xanthine/Inosine containing	1123	LC/MS Neg	361	1600	267.2	58-63-9	6021	C00294	HMDB00195	0.4911	0.5884	0.4748	2.9092	2.4621	3.0332	2.5632	2.8403	2.3613	0.7983	0.9748	0.7846	1.182	0.8529	1.0252	2.6585	2.8565	2.2209	0.8003	0.4248	0.3044	0.6584	1.1146	0.9494
2832	inosine 5'-monophosphate (IMP)	Nucleotide	Purine Metabolism, (Hypo)Xanthine/Inosine containing	2133	LC/MS Pos	362	1310	349	4691-65-0	8582	C00130	HMDB00175	1.5829	1.4422	1.0301	1.2305	1.1636	1.0987	0.9093	0.8901	0.9779	0.7543	0.7818	0.8258	1.1859	0.7712	1.2582	1.2118	1.0149	0.9333	0.8232	0.9378	0.672	0.7625	0.7748	0.8298
1520	inositol 1-phosphate (I1P)	Lipid	Inositol Metabolism	1481	GC/MS	370	2057.8	318.1	573-35-3;106032-59-1	440194	C04006	HMDB00213	0.9042	0.8744	0.7575	1.3177	0.9277	0.9164	1.1555	1.0106	1.1631	1.0293	1.0363	0.9121	1.0808	0.6402	0.7935	1.1096	1.0133	0.92	0.8316	0.8513	0.8371	0.5233	0.8415	1.0065
1521	inositol 2-phosphate (I2P)	Lipid	Inositol Metabolism	27725	GC/MS	100001004	2072.9	318.1			C01177	HMDB01313	0.7642	0.7862	0.1975	1.1493	0.8935	1.1062	0.1975	1.3211	0.8967	0.8589	1.8658	1.0959	0.74	0.9346	0.1975	1.0062	1.0531	0.9938	1.2918	0.8137	1.3245	0.9398	1.312	0.7317
885	Isobar: fructose 1,6-diphosphate, glucose 1,6-diphosphate, myo-inositol 1,4 or 1,3-diphosphate	Carbohydrate	Glycolysis, Gluconeogenesis, and Pyruvate Metabolism	36984	LC/MS Neg	100002180	572	339					1.2955	1.0942	1.2885	1.0336	1.1959	0.8422	1.1449	0.998	1.2462	0.2993	0.5395	0.2993	0.8612	0.8335	1.1654	1.0759	1.0743	0.9351	1.2313	1.3582	1.5731	0.9756	0.7838	0.9731
297	isoleucine	Amino Acid	Leucine, Isoleucine and Valine Metabolism	1125	LC/MS Pos	376	1614	132.1	73-32-5	6306	C00407	HMDB00172	1.2016	1.0084	0.9944	0.9304	0.9583	1.0056	0.865	0.8092	0.854	0.3743	0.5365	0.422	1.3802	1.1088	1.4555	1.2927	1.011	0.8498	1.0749	1.1154	1.1579	0.7149	0.864	0.9043
895	lactate	Carbohydrate	Glycolysis, Gluconeogenesis, and Pyruvate Metabolism	527	GC/MS	482	1102.8	116.9	79-33-4	612	C00186	HMDB00190	1.2691	1.2495	0.9072	1.0089	1.0629	0.8988	0.9862	0.8628	1.2306	0.5485	0.5954	0.6512	1.251	1.1577	1.5727	1.2866	0.8759	0.8266	0.8744	0.9597	1.0667	0.8312	0.8127	0.811
2040	lathosterol	Lipid	Sterol	39864	GC/MS	100001105	2337	255.2	80-99-9;80-99-9	65728	C01189	HMDB01170	1.5699	0.9733	1.0555	1.0699	1.621	1.0165	0.8226	0.6225	0.5758	0.8387	0.2557	0.2557	2.3407	2.1067	2.2425	2.5375	1.9008	1.3706	0.9225	0.7219	0.9066	0.4529	0.2557	0.7531
266	leucine	Amino Acid	Leucine, Isoleucine and Valine Metabolism	60	LC/MS Pos	397	1674	132.2	61-90-5	6106	C00123	HMDB00687	1.3921	1.1235	0.9067	0.8867	0.9199	0.9516	0.91	0.851	0.9959	0.4454	0.5519	0.528	1.4889	1.4763	1.6675	1.2785	0.9422	0.9531	1.1848	1.2185	1.2959	0.6793	0.7847	0.8581
1146	linoleate (18:2n6)	Lipid	Polyunsaturated Fatty Acid (n3 and n6)	1105	LC/MS Neg	180	5533	279.3	60-33-3	5280450	C01595	HMDB00673	1.3508	1.0221	1.2878	0.9588	1.1735	0.761	1.0993	0.7696	1.0092	1.0327	1.5263	1.0871	0.916	0.929	0.9233	0.9908	1.0701	0.9052	0.7012	0.8238	0.9036	1.2281	1.2252	1.2496
1148	linolenate [alpha or gamma; (18:3n3 or 6)]	Lipid	Polyunsaturated Fatty Acid (n3 and n6)	34035	LC/MS Neg	100001337	5450	277.3		5280934	C06426	HMDB03073	1.1016	1.0504	1.0828	0.8192	0.7879	0.707	1.0179	0.7272	0.9409	1.1442	1.7421	1.1165	0.8388	0.8291	0.5355	0.8075	1.0153	1.0826	0.9453	0.9109	0.9	2.0516	1.2906	1.4091
82	lysine	Amino Acid	Lysine Metabolism	1301	GC/MS	407	1836.7	317.2	56-87-1	5962	C00047	HMDB00182	1.0692	1.2423	0.8087	0.9803	0.763	0.917	0.6211	0.6914	1.064	0.4459	0.4088	0.4302	1.2223	1.0669	1.3778	1.3157	0.9193	0.8802	1.0247	1.0668	1.1598	0.6053	0.7475	0.7852
1076	malate	Energy	TCA Cycle	1303	GC/MS	409	1502	233	6915-15-7	525	C00149	HMDB00156	1.1063	1.0641	0.851	1.2235	1.1914	0.9309	1.5838	1.1589	1.5402	0.646	0.6613	0.5147	0.8981	0.7558	0.9424	1.4913	1.1758	1.0105	0.9895	1.0585	1.089	0.8433	0.8569	0.89
991	mannose-6-phosphate	Carbohydrate	Fructose, Mannose and Galactose Metabolism	1470	GC/MS	294	2035.9	387.2	70442-25-0;104872-94-8	439198	C00275	HMDB01078	0.859	1.5876	1.0471	1.2312	1.5299	1.0049	1.5535	0.5575	1.3922	0.7011	0.1766	0.4896	1.6945	1.253	1.5229	0.7649	0.3084	0.5892	0.8373	0.8725	1.0568	0.6222	1.0232	0.8866
1157	mead acid (20:3n9)	Lipid	Polyunsaturated Fatty Acid (n3 and n6)	35174	LC/MS Neg	100001472	5642	305.4	20590-32-3	5312531		HMDB10378	1.0748	0.9409	1.061	0.7787	0.7973	0.7735	1.1378	0.4721	0.6433	1.6013	2.5439	1.6074	0.5925	0.8619	0.6812	0.7922	1.0444	1.2054	0.8701	0.7792	1.0594	2.2469	1.9631	1.944
330	methionine	Amino Acid	Methionine, Cysteine, SAM and Taurine Metabolism	1302	LC/MS Pos	415	1252	150.1	63-68-3	6137	C00073	HMDB00696	1.3758	1.2685	1.0316	0.9924	1.0076	0.8778	0.8902	0.8234	1.0485	0.5267	0.5803	0.6269	1.3352	1.2127	1.4244	1.3664	0.9684	1.0474	1.3027	1.3123	1.4112	0.6932	0.7637	0.9897
335	methionine sulfoxide	Amino Acid	Methionine, Cysteine, SAM and Taurine Metabolism	18374	LC/MS Pos	100000039	729	166.1	3226-65-1	158980	C02989	HMDB02005	1.4479	1.1316	1.1802	0.8916	0.9566	0.8658	1.1653	0.7325	1.1709	0.4388	0.6359	0.4388	0.4388	0.9184	1.5316	0.4388	1.1287	0.904	0.8643	0.4388	0.6182	1.0191	1.1351	1.0157
1512	myo-inositol	Lipid	Inositol Metabolism	19934	GC/MS	363	1924.9	217	87-89-8	892	C00137	HMDB00211	1.9263	2.0586	0.8821	1.9735	1.2465	2.1449	0.9911	1.3359	2.2066	0.3667	0.3254	0.3063	1.1206	0.7379	0.9664	1.2664	0.8057	0.6319	0.9006	1.0585	1.0456	0.3587	0.6651	0.557
1103	myristoleate (14:1n5)	Lipid	Long Chain Fatty Acid	32418	LC/MS Neg	100001198	5338	225.3	544-64-9	5281119	C08322	HMDB02000	1.5263	1	0.8595	1.0193	1.1669	0.9204	1.2507	0.8735	1.4238	1.1169	0.3718	0.695	1.0355	1.2913	0.932	1.5443	1.0483	0.3718	0.5991	0.9042	1.0526	1.546	0.9861	0.3718
1038	N-acetylglucosamine	Carbohydrate	Aminosugar Metabolism	15095	GC/MS	100000281	1903.3	245	7512-17-6	24139	C00140	HMDB00215	0.6432	1.3505	0.7213	0.8056	0.6507	0.2622	0.3946	0.7886	1.4001	0.3685	1.3502	0.2622	1.9478	1.9521	2.5969	1.9761	1.3282	0.3725	1.4278	0.9568	0.2622	0.3937	1.231	0.7782
1039	N-acetylglucosamine 6-phosphate	Carbohydrate	Aminosugar Metabolism	15107	GC/MS	1213	2096.2	387.2	102029-88-9	439219	C00357	HMDB02817	0.1375	0.1375	0.1375	0.1375	0.1375	0.1375	0.1375	0.1375	1.6111	0.1375	0.1375	1.0746	0.8493	0.1375	0.1375	0.1375	0.1375	0.1375	0.1375	0.1375	0.1375	1.2592	0.3626	0.1375
1046	N-acetylneuraminate	Carbohydrate	Aminosugar Metabolism	32377	LC/MS Pos	1162	787	310	131-48-6	439197	C00270	HMDB00230	0.7981	0.7269	0.5972	1.2444	1.2049	1.1249	1.2023	1.0405	1.4093	1.033	1.2215	0.9324	0.5521	0.4718	0.5441	1.0738	1.0067	0.8133	1.2121	1.2167	1.3241	0.726	0.8175	0.8072
10	N-acetylserine	Amino Acid	Glycine, Serine and Threonine Metabolism	37076	GC/MS	100001851	1526	218	97-14-3	65249		HMDB02931	0.8746	1.0002	0.6867	1.1437	1.0179	0.744	0.9799	0.9748	1.0335	0.9608	0.8437	0.6877	1.0745	0.7347	1.329	1.3301	0.9998	1.0753	1.0718	0.9256	1.0089	0.97	1.1899	1.2183
2907	N-carbamoylaspartate	Nucleotide	Pyrimidine Metabolism, Orotate containing	1594	GC/MS	1108	1749	257.1	923-37-5	93072	C00438	HMDB00828	0.9034	0.7437	0.3582	2.1129	1.3739	0.7913	2.5773	1.3838	1.8386	0.5871	0.2929	0.3681	0.2929	0.485	0.7399	1.1218	1.0732	0.8249	0.9258	0.846	1.0583	1.2955	1.6822	1.9298
2975	nicotinamide	Cofactors and Vitamins	Nicotinate and Nicotinamide Metabolism	594	LC/MS Pos	432	1267	123.1	98-92-0	936	C00153	HMDB01406	1.3105	1.2996	1.1617	0.8553	0.9842	0.7072	1.1639	0.7762	1.1967	0.9091	1.0286	0.9388	1.2861	1.1192	1.0965	1.0733	0.6906	0.8324	0.7951	0.9289	1.1878	1.1023	1.1919	1.2469
2979	nicotinamide adenine dinucleotide (NAD+)	Cofactors and Vitamins	Nicotinate and Nicotinamide Metabolism	5278	LC/MS Pos	1310	1370	664	53-84-9	5893	C00003	HMDB00902	1.2109	1.3196	1.0264	1.014	1.1158	1.1092	1.0307	0.8927	1.0306	0.6559	0.8024	0.7725	1.2423	1.0423	1.3021	1.1444	1.1577	1.0913	0.8757	0.932	1.1573	0.8645	0.7843	0.8853
2981	nicotinamide adenine dinucleotide phosphate (NADP+)	Cofactors and Vitamins	Nicotinate and Nicotinamide Metabolism	32380	LC/MS Pos	429	1330	743.9	53-59-8 ;1184-16-3;24292-60-2	5886	C00006	HMDB00217	0.8232	1.2238	0.8532	0.621	1.1987	0.6932	1.103	0.8452	1.0107	1.0523	1.1296	0.9648	0.83	0.7198	0.9269	0.9648	0.8008	1.1057	1.1153	1.1732	1.1882	1.301	1.2018	1.5204
2980	nicotinamide adenine dinucleotide reduced (NADH)	Cofactors and Vitamins	Nicotinate and Nicotinamide Metabolism	31475	LC/MS Neg	428	1554	664.1	58-68-4;606-68-8	439153	C00004	HMDB01487	1.3051	1.2091	1.1236	1	0.9631	1.0531	1.0133	0.7928	0.6175	0.6175	0.9943	0.6839	1.5638	2.5284	2.1218	1.1206	1.0971	1.0928	0.7719	0.6619	0.7171	1.1009	0.7715	0.8599
2977	nicotinamide ribonucleotide (NMN)	Cofactors and Vitamins	Nicotinate and Nicotinamide Metabolism	22152	LC/MS Pos	1312	886	335.1	1094-61-7	14180	C00455	HMDB00229	0.7042	0.7362	0.7958	1.4097	1.1643	1.0087	1.4805	0.7626	1.1323	1.4411	1.7615	1.2026	0.589	0.4808	0.4003	1.1302	1.0466	1.1835	0.9494	0.7705	0.8757	0.9392	1.1041	1.1784
2016	N-palmitoyl-sphingosine (d18:1/16:0)	Lipid	Sphingolipid Metabolism	44877	GC/MS	1518	2609	370.3	24696-26-2	5283564		HMDB04949	1.775	2.1938	1.4247	0.3379	0.3379	0.4725	1.1399	1.0779	0.3379	0.3379	0.4915	0.5382	1.035	1.5013	0.6067	0.5714	1.1968	1.0053	0.7105	1.0888	0.9947	0.6607	0.8095	0.4674
1112	oleate (18:1n9)	Lipid	Long Chain Fatty Acid	1359	GC/MS	442	1984.4	339.2	112-80-1	445639	C00712	HMDB00207	1.1971	1.0397	1.0555	1.0076	0.9327	0.7944	1.079	0.7109	1.0278	1.0689	1.0993	1.0321	0.9714	0.8766	1.0506	0.991	0.7867	0.9059	0.8562	0.9599	0.9668	1.0827	1.038	1.011
431	ophthalmate	Amino Acid	Glutathione Metabolism	34592	LC/MS Pos	100001311	1457	290.1	495-27-2	7018721		HMDB05765	0.6721	0.7015	0.5134	1.1087	1.1283	0.9377	1.1624	1.0121	1.2458	0.421	0.45	0.3289	1.37	1.1066	1.25	1.2136	1.0121	0.9768	1.017	1.2349	1.3199	0.8391	0.8945	0.9879
369	ornithine	Amino Acid	Urea cycle; Arginine and Proline Metabolism	1493	GC/MS	444	1763.8	142	3184-13-2	6262	C00077	HMDB03374	1.1434	1.2663	0.7815	1.2425	0.8152	1.2889	0.8186	0.9297	1.4086	0.7199	1.1143	0.5681	1.2585	1.0014	1.5148	1.1229	0.9018	0.7408	1.0903	0.8359	1.0772	0.9144	0.8981	1.0102
2909	orotate	Nucleotide	Pyrimidine Metabolism, Orotate containing	1505	GC/MS	445	1709.6	254.1	50887-69-9	967	C00295	HMDB00226	0.9211	0.7224	0.444	1.5003	1.2138	1.1555	1.6885	1.2197	1.2145	0.6128	0.7424	0.6989	0.4287	0.4043	0.3067	1.3152	0.9579	0.8855	1.2901	0.9951	0.8537	1.5725	2.1575	1.9038
1106	palmitoleate (16:1n7)	Lipid	Long Chain Fatty Acid	33447	LC/MS Neg	452	5477	253.3	373-49-9	445638	C08362	HMDB03229	0.9828	0.8914	1.1565	0.8329	1.2522	0.7627	1.2118	0.8592	1.0709	1.1942	1.8482	1.4804	0.5841	1.0351	0.8359	1.0822	1.3475	0.7668	0.7629	0.829	0.9988	1.4443	1.2127	1.1531
1990	palmitoyl sphingomyelin (d18:1/16:0)	Lipid	Sphingolipid Metabolism	37506	GC/MS	100002107	2524	311.3	6254-89-3	9939941			1.2081	1.2495	0.9089	0.9744	0.9885	0.9072	0.9706	0.7275	1.056	0.7603	0.9021	0.7657	1.1925	1.0783	1.3654	1.3171	1.065	0.8683	1.018	0.9505	0.9797	0.8308	1.0175	0.9795
3000	pantothenate	Cofactors and Vitamins	Pantothenate and CoA Metabolism	1508	LC/MS Pos	1024	2218	220.1	137-08-6	6613	C00864	HMDB00210	1.1827	1.1945	0.9333	1.0313	1.1719	0.9746	1.0091	0.8201	0.9727	0.5279	0.5927	0.5516	1.4393	1.0827	1.5505	1.3193	1.2422	0.9927	0.9667	1.0098	1.2868	0.887	0.8231	1.0073
4034	phenol red	Xenobiotics	Chemical	36817	LC/MS Neg	100001724	3650	353.1	143-74-8	4766	C12600		1.0596	1.0873	1.0114	0.8871	0.8419	0.9178	0.9007	0.8272	0.9538	0.7921	0.9018	1.1814	1.1591	1.381	1.3834	1.1718	0.9121	0.8515	1.1152	1.1369	1.3092	1.4865	1.3917	1.6265
110	phenylalanine	Amino Acid	Phenylalanine and Tyrosine Metabolism	64	LC/MS Pos	460	2056	166.1	63-91-2	6140	C00079	HMDB00159	1.1772	1.1526	0.9329	1.0014	0.9886	0.9654	0.9545	0.7274	0.9563	0.4811	0.5225	0.6709	1.6646	1.2489	1.5666	1.3893	0.9495	0.9573	1.1315	1.2054	1.3858	0.7683	0.7098	0.8638
115	phenyllactate (PLA)	Amino Acid	Phenylalanine and Tyrosine Metabolism	22130	GC/MS	100000774	1587.8	193	828-01-3	3848	C05607	HMDB00779	0.4111	0.8031	0.4111	1.0366	1.4158	0.9495	1.8127	0.5766	1.1196	1.8021	2.6445	2.2602	0.4111	0.9075	1.369	1.0916	0.7526	0.5256	0.6279	0.6466	0.4111	1.5738	1.0173	1.0064
1090	phosphate	Energy	Oxidative Phosphorylation	11438	GC/MS	461	1307.7	298.9	7664-38-2	1061	C00009	HMDB01429	1.3047	1.3142	0.92	1.2069	0.97	0.9668	1.0486	0.8205	1.1936	0.7037	0.7126	0.6123	1.0706	0.8634	1.2828	1.3279	0.9934	0.8967	1.0066	0.8571	1.0473	0.663	0.7611	0.8539
1547	phosphoethanolamine	Lipid	Phospholipid Metabolism	12102	GC/MS	1026	1577.3	299.1	1071-23-4	1015	C00346	HMDB00224	1.0186	1.2143	0.7127	1.2492	1.225	0.7455	1.1495	0.8025	1.2241	0.8752	1.0484	0.8845	0.5121	0.5686	0.6291	1.4014	0.8485	0.9892	1.4919	1.2169	1.6673	0.5841	0.9872	0.741
3002	phosphopantetheine	Cofactors and Vitamins	Pantothenate and CoA Metabolism	15504	LC/MS Neg	100000328	1624	357.2	NA	987	C01134	HMDB01416	1.6261	1.6607	1.315	0.6673	0.8289	1.0832	1.0005	1.1015	1.0201	0.8364	0.7528	0.8248	1.5517	1.2553	1.2176	0.9947	0.9551	0.7316	0.9928	0.9473	1.0043	0.901	1.1482	1.4481
370	proline	Amino Acid	Urea cycle; Arginine and Proline Metabolism	1898	LC/MS Pos	480	796	116.1	147-85-3	145742	C00148	HMDB00162	1.1442	0.9252	0.8102	1.1612	1.0354	1.033	1.0269	0.9211	1.2642	0.6968	0.8212	0.6211	1.348	1.1401	1.296	1.0971	0.9249	0.7416	0.8862	0.8613	0.966	1.1935	1.2791	1.3696
406	putrescine	Amino Acid	Polyamine Metabolism	1408	GC/MS	49	1705.8	174	110-60-1	1045	C00134	HMDB01414	1.4938	1.3962	0.958	2.3285	1.5399	1.9431	0.9234	0.9651	1.454	0.4239	0.3548	0.2579	0.8043	0.6354	0.8489	2.6174	1.8451	1.4371	1.0889	1.0039	1.008	0.5526	0.6147	0.6482
3076	pyridoxine (Vitamin B6)	Cofactors and Vitamins	Vitamin B6 Metabolism	608	LC/MS Pos	936	1386	170.1	58-56-0	1054	C00314	HMDB02075	1.3264	1.4706	1.3611	0.9169	1.259	0.8697	1.1958	0.9156	1.166	0.5111	0.5556	0.7491	1.3257	1.1285	1.5096	1.1032	0.8319	0.7839	0.7673	1.0017	1.049	0.946	0.783	0.8617
54	pyroglutamine*	Amino Acid	Glutamate Metabolism	32672	LC/MS Pos	100001540	764	129.2	2353-44-8	134508			1.1128	0.5348	0.4007	1.4839	0.8123	0.5277	0.5787	1.0037	0.5222	0.77	1.4781	0.8736	0.8316	0.6647	1.1784	1.1079	0.5498	0.7335	1.2761	1	1.5447	1.6417	2.3614	1.4695
913	ribitol	Carbohydrate	Pentose Metabolism	15772	GC/MS	100000406	1692.4	217	488-81-3	6912	C00474	HMDB00508	1.1462	0.8132	0.6266	1.0599	1.018	1.1155	1.1751	0.9418	1.1086	0.6301	0.6613	0.4805	0.7108	1.1102	1.1082	1.5011	1.0338	1.0288	1.0371	1.2956	1.0916	0.648	0.5875	0.6085
912	ribose	Carbohydrate	Pentose Metabolism	12083	GC/MS	914	1652	204	50-69-1	5779	C00121	HMDB00283	1.2095	1.4833	0.8462	1.0018	0.6385	1.3304	0.8621	1.1678	1.6681	0.5218	0.1975	0.8918	1.8872	1.0273	0.6726	2.4186	1.0229	0.1975	1.0678	1.1368	0.8693	0.49	0.2964	1.6256
903	ribose 5-phosphate	Carbohydrate	Pentose Phosphate Pathway	561	GC/MS	19	1928.4	315.1	18265-46-8;108321-05-7		C00117	HMDB01548	0.8323	0.7978	1.0916	1.4016	1.1811	1.1668	1.4335	0.9186	0.86	0.3888	0.5644	0.7828	1.1673	1.2365	1.4438	1.4098	1.1835	1.2462	1.0671	0.9032	0.5605	0.8847	1.0068	0.7136
908	ribulose/xylulose 5-phosphate	Carbohydrate	Pentose Phosphate Pathway	37288	GC/MS	100002179	1935	357.2			C00199		1.2866	1.0945	1.4373	1.1109	1.1898	0.8792	1.5835	0.5545	0.8424	0.5655	0.3904	0.939	1.0786	1.6734	1.4851	1.3925	1.2403	1.3518	0.7691	0.5761	0.5132	0.9339	0.7438	0.6765
338	S-adenosylhomocysteine (SAH)	Amino Acid	Methionine, Cysteine, SAM and Taurine Metabolism	15948	LC/MS Neg	197	1821	383.1	979-92-0	439155	C00021	HMDB00939	0.7563	0.9369	0.7563	1.1835	1.1328	0.9432	1.4352	0.9359	0.9573	1	1.4049	0.8463	1.3077	0.9538	0.7563	1.5322	1.1614	0.9169	0.7563	0.7563	0.7563	0.9017	1.0252	0.9126
337	S-adenosylmethionine (SAM)	Amino Acid	Methionine, Cysteine, SAM and Taurine Metabolism	15915	LC/MS Pos	1263	676	399.1	24346-00-7;86867-01-8;86867-0108	34755	C00019	HMDB01185	0.7508	0.8159	0.8041	0.8264	0.9814	0.8034	0.8773	0.8246	1.0094	1.0971	1.1013	1.1492	0.997	0.8859	1.2851	1.1293	1.003	0.839	0.8116	0.8755	0.8015	1.4525	1.1871	1.3817
4	sarcosine	Amino Acid	Glycine, Serine and Threonine Metabolism	1516	GC/MS	1023	1182.9	116	107-97-1	1088	C00213	HMDB00271	0.4579	0.4948	0.1902	1.0159	0.9938	0.8363	1.3089	0.8625	1.1432	2.2489	2.6265	1.8969	0.8724	0.8271	1.0006	1.0625	1	0.6781	0.9609	0.8657	1.0605	2.9285	3.2578	3.1103
1515	scyllo-inositol	Lipid	Inositol Metabolism	32379	GC/MS	100001215	1893.8	318.2	488-59-5	892	C06153	HMDB06088	1.0139	1.28	1.3846	1.2229	0.8523	1.3991	0.3092	0.3092	1.6627	0.3092	0.3092	0.3092	1.4834	0.6229	0.4107	1.0005	0.9995	0.7404	0.8919	1.0816	0.3092	0.3092	0.3092	0.819
9	serine	Amino Acid	Glycine, Serine and Threonine Metabolism	1648	GC/MS	503	1389.1	204	56-45-1	5951	C00065	HMDB00187	0.9954	0.9464	0.7604	1.0984	1.0023	0.9215	0.9626	0.7208	0.9425	0.6132	0.6976	0.5488	1.2558	1.0289	1.4881	1.4052	0.9977	0.9268	1.2688	1.2411	1.2971	1.1821	1.209	1.2813
987	sorbitol	Carbohydrate	Fructose, Mannose and Galactose Metabolism	15053	GC/MS	506	1843	319.1	6706-59-8	5780	C00794	HMDB00247	1.1613	1.2298	0.6798	1.0587	0.8094	1.2314	0.5495	0.6823	0.9919	0.2144	0.1772	0.1321	1.7068	1.6308	1.9534	1.9224	1.2	1.0081	1.0311	0.9174	1.1861	0.5152	0.635	0.587
409	spermidine	Amino Acid	Polyamine Metabolism	485	LC/MS Pos	50	533	146.2	124-20-9	1102	C00315	HMDB01257	1.0485	1.1343	0.6915	2.3585	1.4574	1.3233	2.434	0.914	1.7259	0.8645	0.5239	0.578	0.34	0.2061	0.2276	1.4746	1.6982	1.1962	1.0634	1.1791	0.987	0.3016	0.3292	0.5078
407	spermine	Amino Acid	Polyamine Metabolism	603	LC/MS Pos	507	506	203.2	71-44-3	1103	C00750	HMDB01256	0.7279	0.8423	0.5256	1.7596	1.3286	1.0391	2.6845	0.8484	1.2049	1.4717	1.0015	0.9135	0.3244	0.3244	0.3244	1.2524	1.3366	1.1669	0.9559	0.9985	0.9106	0.3244	0.3788	0.5443
1110	stearate (18:0)	Lipid	Long Chain Fatty Acid	1358	LC/MS Neg	439	5886	283.4	57-11-4	5281	C01530	HMDB00827	1.3152	0.989	1.2359	0.9902	1.2071	0.9334	0.9953	0.8825	1.0367	0.8185	1.0692	0.8527	1.1877	1.0275	1.3864	1.1513	1.079	0.8903	0.8625	0.9231	1.0047	0.9595	0.9945	0.8226
1991	stearoyl sphingomyelin (d18:1/18:0)	Lipid	Sphingolipid Metabolism	19503	GC/MS	1538	2645	311.3	85187-10-6;85187-10-6	6453725	C00550	HMDB01348	1.5552	1.6064	0.1785	0.7574	0.1646	0.5267	1.1313	0.3559	0.5586	0.4575	0.9394	0.8537	1.1358	0.9232	1.322	0.6737	0.5764	1.2196	1.2113	1.5652	1.5711	0.8918	1.4281	1.5632
1074	succinate	Energy	TCA Cycle	1437	GC/MS	252	1348	247	110-15-6	1110	C00042	HMDB00254	1.0127	1.0184	0.8483	0.9608	0.9822	0.883	1.2395	0.9055	1.2867	0.7843	0.9564	0.9892	1.1158	1.0103	1.3831	1.2479	0.8853	0.8851	0.9832	0.9545	1.1696	1.1591	1.1171	1.1444
3064	thiamin (Vitamin B1)	Cofactors and Vitamins	Thiamine Metabolism	5341	LC/MS Pos	873	740	265.1	59-43-8	1130	C00378	HMDB00235	1.2179	0.5871	1.8873	0.8233	1.0946	0.7583	0.9882	0.9435	1.2276	0.9665	0.8837	1.3098	1.2362	0.9828	1.3338	0.7176	0.9672	0.5871	0.9302	1.1764	1.3027	1.2658	0.9916	0.892
15	threonine	Amino Acid	Glycine, Serine and Threonine Metabolism	1284	LC/MS Pos	564	713	120.1	72-19-5	6288	C00188	HMDB00167	0.9486	0.972	0.8497	0.9283	1.1226	0.8289	1.1268	0.9582	1.1885	0.7617	1.0459	0.8059	1.0375	0.9045	1.1887	1.1481	1.0616	0.7992	1.0167	1.3439	1.432	1.4105	1.4985	1.3811
2960	thymidine 5'-monophosphate	Nucleotide	Pyrimidine Metabolism, Thymine containing	12023	LC/MS Neg	1248	924	321.1	33430-62-5	9700	C00364	HMDB01227	1.1703	1.0346	0.709	1	0.9926	0.9895	1.046	0.9323	1.195	0.533	0.5219	0.5219	1.0098	0.8974	0.9946	1.3667	1.2329	0.9926	1.2286	1.3778	1.2283	0.5219	0.7052	0.5866
388	trans-4-hydroxyproline	Amino Acid	Urea cycle; Arginine and Proline Metabolism	1366	GC/MS	1001	1537	140	51-35-4	5810	C01157	HMDB00725	1.1833	0.9884	0.803	1.0509	0.9408	0.8458	0.9821	0.5556	0.8486	0.391	0.5068	0.4199	1.2844	1.0035	1.3755	1.2082	0.8693	1.0275	1.3297	1.224	1.411	1.1803	1.1247	1.269
217	tryptophan	Amino Acid	Tryptophan Metabolism	54	LC/MS Pos	565	2445	205.1	73-22-3	6305	C00078	HMDB00929	1.1163	1.206	0.7965	0.9403	0.8995	0.8635	0.8293	0.8232	1.0286	0.4687	0.5375	0.6105	1.3887	1.2587	1.5607	1.0486	1.0029	0.8945	1.0588	1.1381	1.094	0.7539	0.8438	0.8384
123	tyrosine	Amino Acid	Phenylalanine and Tyrosine Metabolism	1299	LC/MS Pos	815	1516	182.1	60-18-4	6057	C00082	HMDB00158	1.1241	1.0718	0.7718	0.9336	0.9442	0.9305	0.735	0.7299	0.973	0.3932	0.5065	0.4458	1.4746	1.0586	1.3953	1.2862	0.9272	0.8525	1.0496	1.0395	1.1823	0.6229	0.6668	0.7316
1017	UDP-galactose	Carbohydrate	Nucleotide Sugar	15860	GC/MS	100000298	1973	243.1	2956-16-3;91183-98-1;137868-52-1	18068	C00052	HMDB00302	2.718	2.4369	1.023	1.3665	0.9718	0.2383	1.2853	0.6882	0.9296	0.973	1.0245	0.6826	1.8935	1.3952	1.754	1.7542	1	0.814	0.8691	0.8022	1.3081	0.8006	0.7019	1.4718
1013	UDP-glucose	Carbohydrate	Nucleotide Sugar	32344	GC/MS	1096	1986	243.1	117756-22-6	8629	C00029	HMDB00286	1.6528	1.6794	1.6626	0.6307	0.582	0.9938	1.0905	1.3023	1.2336	0.8055	1.1965	0.4533	2.4505	0.7969	1.4723	0.9168	0.8103	0.5044	0.811	0.3539	1.085	0.4259	1.0363	0.8691
1018	UDP-glucuronate	Carbohydrate	Nucleotide Sugar	2763	LC/MS Neg	1097	594	579.1	28053-08-9;63700-19-6	17473	C00167	HMDB00935	2.6543	2.3223	2.0455	0.9467	0.8275	0.7791	0.9406	0.885	1.1038	1.0743	1.127	0.9651	1.3372	1.139	1.8198	0.9937	0.8309	0.7582	0.7699	0.7487	0.8663	1.1437	1.0125	1.3499
1024	UDP-N-acetylglucosamine/galactosamine	Carbohydrate	Nucleotide Sugar	38673	LC/MS Neg	100002957	661	606.1					1.3967	1.7102	1.49	0.6973	0.8014	0.6094	0.7479	0.7615	1.0908	1.2957	1.3196	0.9899	2.0024	1.3409	1.8256	0.8598	0.8163	0.5764	0.5765	0.7057	0.5292	1.4339	1.2408	1.3047
2922	uracil	Nucleotide	Pyrimidine Metabolism, Uracil containing	605	GC/MS	825	1370.4	241	66-22-8	1174	C00106	HMDB00300	1.235	1.4565	0.8006	0.5764	0.4293	0.6559	0.6513	0.475	0.789	1.4455	1.5289	1.073	3.9717	2.2405	2.7302	1.2887	1.1442	1.2201	0.5699	0.5819	0.4821	0.4329	1.1859	0.9561
2921	uridine	Nucleotide	Pyrimidine Metabolism, Uracil containing	606	LC/MS Neg	535	1430	243.1	58-96-8	6029	C00299	HMDB00296	2.8279	3.2814	2.6959	0.5836	0.6482	0.7406	0.8482	0.8111	1.0055	0.7841	1.0508	0.9103	3.1193	2.8932	3.5217	1.1512	0.9486	0.8834	1.0052	0.9442	1.2027	0.7779	0.7902	0.8106
2917	uridine monophosphate (5' or 3')	Nucleotide	Pyrimidine Metabolism, Uracil containing	39879	LC/MS Pos	100003366	1079	325	58-97-9	6030		HMDB00288	2.5819	2.5398	2.0993	0.8662	0.9202	0.7743	1.0094	1.0348	1.3324	0.6334	0.7663	0.6815	2.0357	1.7918	2.2788	1.2132	0.9456	0.7611	0.8779	0.8727	0.9467	0.9413	0.8429	1.1022
312	valine	Amino Acid	Leucine, Isoleucine and Valine Metabolism	1649	LC/MS Pos	566	1040	118.1	72-18-4	6287	C00183	HMDB00883	0.9775	1.0501	0.9706	0.8778	0.8379	0.8546	0.9715	0.8106	1.1724	0.416	0.4838	0.503	1.4612	1.2582	1.3757	1.4066	1.0012	1.0389	1.1815	1.2219	1.2829	0.6781	0.7654	0.8776
919	xylitol	Carbohydrate	Pentose Metabolism	4966	GC/MS	543	1677.6	307.2	87-99-0	6912	C00379	HMDB02917	1.1256	1.2521	0.7365	1.292	1.132	1.0798	0.8501	1.0487	0.9441	0.8233	0.785	0.6938	1.0489	1.1328	1.2244	1.5971	1	1.0825	0.9868	0.8155	0.8555	1.0269	0.9145	1.0014

## Sheet: Pathway
Pathway	This is the fold changes associated with the statistical analysis of the data.
	Indicates ratios, p- and q-values for each comparison.
	* indicates compounds that have not been officially confirmed based on a standard, but we are confident in its identity
	** samples without a protein measure (i.e. the media) are lost by this normalization, as well as any compounds that were only detected in these samples
	Fold change between groups in this study. A: DF-1 in DMEM/F12(1:1);B: DF-1 in DMEM.										Fold of Change																	Statistical Values-ANOVA Contrasts
										X																	X
											A 24h	A 36h	A 72h	A 36h	A 72h	A 72h	B 24h	B 36h	B 72h	B 36h	B 72h	B 72h	B 12h	B 24h	B 36h	B 72h		A 24h		A 36h		A 72h		A 36h		A 72h		A 72h		B 24h		B 36h		B 72h		B 36h		B 72h
																												A 12h		A 12h		A 12h		A 24h		A 24h		A 36h		B 12h		B 12h		B 12h		B 24h		B 24h
	Pathway Sort Order	Super Pathway	Sub Pathway	Biochemical Name	Platform	Comp ID	KEGG	HMDB	PUBCHEM	X	A 12h	A 12h	A 12h	A 24h	A 24h	A 36h	B 12h	B 12h	B 12h	B 24h	B 24h	B 36h	A 12h	A 24h	A 36h	A 72h	X	p-value	q-value	p-value	q-value	p-value	q-value	p-value	q-value	p-value	q-value	p-value	q-value	p-value	q-value	p-value	q-value	p-value	q-value	p-value	q-value	p-value	q-value
	1	Amino Acid	Glycine, Serine and Threonine Metabolism	glycine	GC/MS	11777	C00037	HMDB00123	750		1.57	1.59	0.93	1.01	0.59	0.58	0.94	1.24	1.48	1.32	1.57	1.19	1.63	0.98	1.28	2.6		0.0028	0.0083	0.0028	0.0076	0.5784	0.2133	0.9934	0.943	0.0009	0.0009	0.0008	0.0015	0.5844	0.4762	0.1089	0.1065	0.0079	0.0108	0.0384	0.1562	0.0024	0.005
	4			sarcosine	GC/MS	1516	C00213	HMDB00271	1088		2.49	2.9	5.92	1.16	2.38	2.04	1.01	1.07	3.44	1.05	3.39	3.22	2.36	0.96	0.87	1.37		9.9372e-05	0.0004	2.3719e-05	0.0001	4.8209e-08	2.3108e-07	0.4743	0.8425	0.0004	0.0004	0.0018	0.0027	0.9971	0.6277	0.7339	0.3669	8.5279e-06	3.9067e-05	0.7313	0.5845	8.4713e-06	7.3233e-05
	6			betaine	LC/MS pos	3141	C00719	HMDB00043	247		0.85	0.88	0.47	1.03	0.55	0.53	0.92	0.91	0.89	1	0.98	0.98	0.77	0.82	0.8	1.47		0.1753	0.1662	0.2565	0.1955	4.6804e-06	9.7216e-06	0.8123	0.9125	6.7735e-05	9.8445e-05	4.2171e-05	0.0001	0.464	0.4194	0.4739	0.2737	0.4012	0.2643	0.9868	0.6836	0.9121	0.5137
	9			serine	GC/MS	1648	C00065	HMDB00187	5951		1.12	0.97	0.69	0.87	0.62	0.71	0.88	1.01	0.97	1.14	1.1	0.96	1.4	1.1	1.45	1.97		0.3214	0.2143	0.7924	0.418	0.0047	0.0035	0.2151	0.7965	0.0005	0.0006	0.0083	0.0101	0.2662	0.3013	0.8611	0.4085	0.8877	0.4943	0.2022	0.3231	0.3281	0.2397
	10			N-acetylserine	GC/MS	37076		HMDB02931	65249		1.13	1.17	0.97	1.03	0.86	0.83	1.09	0.96	1.08	0.88	0.99	1.12	1.23	1.17	1.01	1.36		0.4093	0.2465	0.2668	0.2017	0.8648	0.2929	0.7656	0.9125	0.3227	0.1181	0.2042	0.1386	0.4836	0.4293	0.9145	0.418	0.5074	0.3176	0.4208	0.4694	0.9693	0.5298
	15			threonine	LC/MS pos	1284	C00188	HMDB00167	6288		1.04	1.18	0.94	1.14	0.91	0.8	0.96	1.21	1.37	1.26	1.43	1.13	1.13	1.04	1.16	1.64		0.7813	0.3568	0.1732	0.1404	0.5734	0.2127	0.2698	0.7965	0.404	0.1402	0.0627	0.0572	0.7004	0.5196	0.1242	0.1137	0.0134	0.0169	0.0611	0.1874	0.0059	0.0098
	17			allo-threonine	GC/MS	15142	C05519	HMDB04041	99289		0.39	0.76	0.53	1.94	1.36	0.7	0.57	0.88	0.64	1.55	1.12	0.72	1.62	2.35	1.88	1.94		0.1457	0.1565	0.5265	0.3267	0.309	0.125	0.3909	0.8425	0.6386	0.1997	0.6921	0.3705	0.1324	0.1993	0.8553	0.4085	0.317	0.2188	0.1806	0.3094	0.5882	0.3759
	28		Alanine and Aspartate Metabolism	alanine	GC/MS	1126	C00041	HMDB00161	5950		1.31	1.51	1.03	1.16	0.79	0.68	0.97	0.87	1.02	0.9	1.05	1.16	1.64	1.22	0.95	1.62		0.0321	0.0517	0.0026	0.0072	0.7466	0.263	0.2397	0.7965	0.0605	0.0299	0.0051	0.0067	0.7541	0.5491	0.2771	0.1923	0.8532	0.4831	0.4318	0.4708	0.6192	0.3838
	31			aspartate	GC/MS	15996	C00049	HMDB00191	5960		1.16	1.25	0.29	1.08	0.25	0.24	0.63	0.91	0.4	1.45	0.64	0.44	1.68	0.91	1.22	2.3		0.1893	0.1708	0.0572	0.0711	3.0486e-09	2.1108e-08	0.5073	0.8477	6.0544e-10	8.1394e-09	2.8659e-10	9.4176e-09	0.0004	0.0022	0.4105	0.247	2.3373e-07	1.812e-06	0.0026	0.0267	0.0008	0.0022
	33			asparagine	GC/MS	11398	C00152	HMDB00168	6267		1.27	1.1	0.75	0.86	0.59	0.69	0.9	0.77	0.68	0.85	0.76	0.89	1.36	0.96	0.95	1.23		0.2124	0.1756	0.7528	0.413	0.1465	0.0652	0.3424	0.8231	0.0122	0.0078	0.0834	0.0731	0.5218	0.4463	0.1464	0.1273	0.064	0.0602	0.3962	0.4626	0.2005	0.1627
	42		Glutamate Metabolism	glutamate	LC/MS pos	57	C00025	HMDB00148	611		0.87	0.77	0.52	0.89	0.59	0.67	1.05	0.94	0.58	0.9	0.55	0.61	0.81	0.97	0.98	0.9		0.1817	0.168	0.0252	0.0412	9.9554e-06	1.6766e-05	0.2992	0.7965	0.0001	0.0002	0.0014	0.0022	0.6533	0.5105	0.6127	0.338	9.7848e-05	0.0002	0.3445	0.4247	3.9674e-05	0.0002
	43			glutamine	LC/MS pos	53	C00064	HMDB00641	5961		0.81	0.7	0.1	0.86	0.12	0.14	0.88	0.94	0.28	1.06	0.31	0.3	1.09	1.18	1.47	3.12		0.1698	0.1662	0.0232	0.0386	2.4961e-11	1.5554e-09	0.2992	0.7965	1.0146e-10	4.478e-09	3.1299e-10	9.4176e-09	0.3885	0.3765	0.6771	0.349	1.6087e-07	1.351e-06	0.6501	0.5498	6.5222e-07	1.1813e-05
	47			gamma-aminobutyrate (GABA)	GC/MS	1416	C00334	HMDB00112	119		0.72	0.16	0.03	0.23	0.04	0.16	0.99	0.74	0.12	0.74	0.13	0.17	0.15	0.21	0.69	0.71		0.2594	0.1943	5.3489e-06	3.2904e-05	2.7538e-10	4.0668e-09	4.805e-05	0.0044	1.0174e-09	1.0943e-08	2.5569e-06	1.4425e-05	0.9926	0.6277	0.2758	0.1923	7.0385e-07	4.4335e-06	0.2719	0.3737	6.9311e-07	1.1813e-05
	54			pyroglutamine*	LC/MS pos	32672			134508		1.38	1.03	1.52	0.75	1.11	1.48	0.89	1.43	2.05	1.6	2.29	1.43	1.31	0.85	1.82	1.75		0.2975	0.2056	0.7952	0.418	0.1366	0.0617	0.4281	0.8425	0.6305	0.1983	0.2109	0.142	0.6845	0.515	0.2418	0.1875	0.0301	0.0326	0.1228	0.2314	0.013	0.0193
	61		Histidine Metabolism	histidine	LC/MS neg	59	C00135	HMDB00177	6274		0.81	0.78	0.55	0.96	0.67	0.71	0.63	0.79	0.53	1.25	0.84	0.67	1.28	0.99	1.29	1.24		0.0802	0.0996	0.0322	0.0479	4.458e-05	6.0389e-05	0.6387	0.887	0.002	0.0016	0.0056	0.0072	0.0005	0.0025	0.0431	0.0553	2.4623e-05	8.8628e-05	0.0481	0.1669	0.1499	0.135
	82		Lysine Metabolism	lysine	GC/MS	1301	C00047	HMDB00182	5962		0.85	0.76	0.41	0.89	0.48	0.54	0.85	0.89	0.58	1.04	0.69	0.66	1.18	1.17	1.37	1.66		0.3015	0.2066	0.0589	0.0711	1.2098e-05	1.9838e-05	0.3483	0.8231	9.4992e-05	0.0001	0.0007	0.0013	0.231	0.2784	0.4191	0.2505	0.0014	0.0023	0.6831	0.5668	0.0189	0.0261
	89			2-aminoadipate	GC/MS	6146	C00956	HMDB00510	469		1.42	1.18	0.53	0.83	0.37	0.45	1.08	0.97	0.44	0.89	0.41	0.45	2.6	1.98	2.13	2.16		0.0885	0.1063	0.5088	0.3262	0.0049	0.0036	0.2718	0.7965	0.0001	0.0002	0.0012	0.002	0.6842	0.515	0.9109	0.418	0.0008	0.0014	0.6049	0.532	0.0003	0.0012
	101			cadaverine	GC/MS	15308	C01672	HMDB02322	273		1.05	0.81	0.28	0.77	0.27	0.34	1.21	0.81	0.45	0.67	0.37	0.56	2.03	2.34	2.02	3.28		0.7893	0.3568	0.2959	0.2182	1.5674e-05	2.5044e-05	0.1951	0.7965	9.456e-06	2.3113e-05	0.0001	0.0003	0.4139	0.3887	0.3567	0.2309	0.002	0.0032	0.0928	0.2173	0.0003	0.0012
	103			5-aminovalerate	GC/MS	18319	C00431	HMDB03355	138		1.23	0.96	0.3	0.78	0.25	0.31	1.33	1.46	0.4	1.1	0.3	0.27	1.42	1.55	2.17	1.88		0.3263	0.2143	0.8256	0.4202	8.8926e-06	1.5832e-05	0.2341	0.7965	1.4853e-06	4.6984e-06	1.3462e-05	5.7864e-05	0.1796	0.229	0.0727	0.0813	0.0003	0.0006	0.612	0.5347	1.9608e-05	0.0001
	110		Phenylalanine and Tyrosine Metabolism	phenylalanine	LC/MS pos	64	C00079	HMDB00159	6140		0.91	0.81	0.51	0.89	0.57	0.63	0.74	0.83	0.52	1.13	0.71	0.63	1.37	1.12	1.41	1.4		0.4325	0.2531	0.083	0.0828	2.836e-05	4.0411e-05	0.3122	0.8003	0.0001	0.0002	0.0012	0.002	0.0153	0.0431	0.1385	0.1247	4.473e-05	0.0001	0.2646	0.3675	0.0122	0.0186
	115			phenyllactate (PLA)	GC/MS	22130	C05607	HMDB00779	3848		2.09	2.16	4.13	1.03	1.97	1.91	0.88	0.63	1.34	0.71	1.52	2.13	1.65	0.7	0.48	0.54		0.0258	0.0477	0.0372	0.0536	0.0003	0.0003	0.8562	0.9207	0.0465	0.0238	0.0325	0.0326	0.8615	0.5896	0.2553	0.1913	0.2432	0.176	0.3309	0.4216	0.1838	0.1531
	123			tyrosine	LC/MS pos	1299	C00082	HMDB00158	6057		0.95	0.82	0.45	0.87	0.48	0.55	0.78	0.83	0.51	1.07	0.66	0.62	1.32	1.09	1.34	1.5		0.7337	0.3451	0.1309	0.1202	7.618e-06	1.3962e-05	0.2307	0.7965	1.4445e-05	3.2366e-05	0.0002	0.0004	0.0518	0.1101	0.1678	0.1399	5.5374e-05	0.0001	0.5208	0.4962	0.0042	0.0079
	134			3-(4-hydroxyphenyl)lactate	GC/MS	1431	C03672	HMDB00755	9378		1.3	1.21	2.27	0.93	1.75	1.88	0.93	0.9	1.52	0.97	1.63	1.68	1.6	1.15	1.2	1.07		0.0272	0.0481	0.0828	0.0828	1.0116e-06	2.6264e-06	0.5698	0.8507	8.6894e-05	0.0001	2.7923e-05	9.6945e-05	0.5164	0.4463	0.3874	0.2381	0.0013	0.0022	0.8247	0.6439	0.0003	0.0012
	217		Tryptophan Metabolism	tryptophan	LC/MS pos	54	C00078	HMDB00929	6305		0.87	0.86	0.52	0.99	0.6	0.6	0.7	0.78	0.58	1.12	0.83	0.74	1.35	1.09	1.23	1.51		0.1952	0.1708	0.1556	0.1309	3.993e-06	8.5799e-06	0.8918	0.9401	4.9865e-05	7.5017e-05	6.5448e-05	0.0002	0.0018	0.0071	0.021	0.037	3.0056e-05	9.466e-05	0.2522	0.3577	0.063	0.0671
	221			indolelactate	GC/MS	18349	C02043	HMDB00671	92904		0.75	0.98	4.1	1.3	5.45	4.2	0.96	0.66	2.72	0.68	2.82	4.13	0.79	1.02	0.54	0.53		0.3412	0.2187	0.9034	0.4346	0.0002	0.0002	0.2858	0.7965	2.1964e-05	4.0727e-05	0.0002	0.0004	0.9385	0.6189	0.3133	0.2092	0.0021	0.0033	0.35	0.4275	0.0018	0.004
	259			C-glycosyltryptophan	LC/MS pos	48782			10981970		0.85	0.8	0.96	0.93	1.13	1.21	0.87	0.83	1.35	0.95	1.55	1.63	0.76	0.78	0.79	1.07		0.2042	0.1708	0.0695	0.0801	0.7765	0.2688	0.5428	0.8507	0.316	0.1164	0.117	0.0918	0.3449	0.3397	0.1581	0.1348	0.0129	0.0164	0.6189	0.5372	0.0017	0.0038
	266		Leucine, Isoleucine and Valine Metabolism	leucine	LC/MS pos	60	C00123	HMDB00687	6106		0.81	0.81	0.45	1	0.55	0.55	0.69	0.8	0.5	1.17	0.73	0.63	1.35	1.15	1.34	1.52		0.0587	0.0811	0.0563	0.0711	4.8856e-07	1.4497e-06	0.9826	0.943	1.7094e-05	3.5355e-05	1.7825e-05	6.9956e-05	0.0012	0.0055	0.0372	0.0517	2.8387e-06	1.5894e-05	0.1185	0.231	0.0068	0.011
	269			4-methyl-2-oxopentanoate	LC/MS neg	22116	C00233	HMDB00695	70		0.89	0.89	1.51	1	1.69	1.69	1.51	1	1.44	0.66	0.95	1.44	0.89	1.51	1	0.85		0.6342	0.3211	0.6342	0.3657	0.1065	0.0517	1	0.943	0.0432	0.0225	0.0432	0.0419	0.0956	0.1584	1	0.446	0.2103	0.157	0.0956	0.2173	0.6477	0.3942
	297			isoleucine	LC/MS pos	1125	C00407	HMDB00172	6306		0.9	0.79	0.42	0.87	0.46	0.53	0.8	0.85	0.63	1.06	0.79	0.74	1.23	1.09	1.32	1.86		0.3572	0.2272	0.039	0.0548	2.4549e-07	8.0511e-07	0.2119	0.7965	1.1373e-06	4.0772e-06	1.1291e-05	5.0963e-05	0.0403	0.0911	0.149	0.1282	0.0004	0.0008	0.4847	0.4962	0.0425	0.0505
	312			valine	LC/MS pos	1649	C00183	HMDB00883	6287		0.86	0.99	0.47	1.15	0.55	0.47	0.84	0.9	0.57	1.07	0.67	0.63	1.37	1.34	1.25	1.65		0.1209	0.1354	0.7901	0.418	4.4688e-07	1.3923e-06	0.1904	0.7965	7.3802e-06	1.9736e-05	6.9317e-07	5.2142e-06	0.0693	0.1311	0.2841	0.1956	1.5406e-05	6.7509e-05	0.4139	0.4694	0.0008	0.0021
	330		Methionine, Cysteine, SAM and Taurine Metabolism	methionine	LC/MS pos	1302	C00073	HMDB00696	6137		0.78	0.75	0.47	0.96	0.6	0.63	0.85	1.01	0.62	1.19	0.72	0.61	1.08	1.18	1.46	1.41		0.0325	0.0517	0.0135	0.0249	1.7798e-06	4.2655e-06	0.6706	0.8879	0.0001	0.0002	0.0003	0.0007	0.1164	0.1808	0.8853	0.4141	0.0002	0.0004	0.0897	0.2173	0.0059	0.0098
	335			methionine sulfoxide	LC/MS pos	18374	C02989	HMDB02005	158980		0.72	0.82	0.4	1.13	0.56	0.49	0.86	0.67	1.1	0.78	1.28	1.65	0.77	0.91	0.63	2.09		0.2576	0.1943	0.4327	0.291	0.0039	0.003	0.717	0.8977	0.0435	0.0225	0.0209	0.0231	0.7005	0.5196	0.255	0.1913	0.4439	0.285	0.4417	0.4776	0.2566	0.1988
	337			S-adenosylmethionine (SAM)	LC/MS pos	15915	C00019	HMDB01185	34755		1.1	1.14	1.41	1.04	1.28	1.23	0.94	0.79	1.27	0.84	1.35	1.62	1.34	1.14	0.92	1.2		0.3148	0.2121	0.1635	0.135	0.0014	0.0012	0.6781	0.8879	0.0127	0.0079	0.0299	0.031	0.5192	0.4463	0.0211	0.037	0.0142	0.0177	0.0758	0.2173	0.0036	0.0068
	338			S-adenosylhomocysteine (SAH)	LC/MS neg	15948	C00021	HMDB00939	439155		1.33	1.36	1.33	1.02	1	0.98	1.2	0.75	0.94	0.63	0.79	1.25	1.23	1.11	0.68	0.87		0.0896	0.1063	0.0841	0.0828	0.1129	0.0537	0.9725	0.943	0.8985	0.257	0.8713	0.4298	0.2659	0.3013	0.1203	0.1116	0.817	0.4679	0.013	0.0746	0.1841	0.1531
	339			homocysteine	GC/MS	40266	C00155	HMDB00742	778		0.86	0.85	0.57	0.99	0.67	0.67	1.41	1.44	1.11	1.03	0.79	0.77	0.72	1.18	1.23	1.4		0.6029	0.3112	0.7991	0.418	0.3418	0.1357	0.7891	0.9125	0.6595	0.205	0.4814	0.2808	0.7848	0.5592	0.3656	0.2331	0.787	0.4558	0.5227	0.4962	0.9977	0.5298
	342			cystathionine	GC/MS	15705	C02291	HMDB00099	439258		0.83	0.72	0.18	0.88	0.22	0.25	1.04	0.93	0.62	0.89	0.6	0.67	1.09	1.38	1.41	3.8		0.195	0.1708	0.031	0.0479	9.8072e-10	8.1853e-09	0.3268	0.8148	5.0538e-09	3.8824e-08	1.9132e-08	2.3362e-07	0.8006	0.5671	0.6426	0.3478	0.0033	0.0049	0.476	0.4962	0.0019	0.0041
	345			2-aminobutyrate	GC/MS	1577	C02261	HMDB00650	439691		1.55	1.28	0.4	0.83	0.26	0.32	0.86	0.93	0.7	1.08	0.81	0.75	1.6	0.89	1.17	2.76		0.0252	0.0477	0.186	0.1486	0.0001	0.0002	0.2928	0.7965	1.4724e-06	4.6984e-06	1.0113e-05	4.8048e-05	0.3076	0.3244	0.696	0.3566	0.0698	0.0651	0.5212	0.4962	0.3868	0.2745
	347			cysteine	GC/MS	31453	C00097	HMDB00574	5862		0.72	0.66	0.65	0.92	0.9	0.99	1.02	0.88	0.72	0.86	0.71	0.82	0.93	1.33	1.25	1.04		0.032	0.0517	0.0071	0.016	0.0067	0.0047	0.4732	0.8425	0.4574	0.1557	0.9788	0.465	0.91	0.6124	0.4489	0.261	0.0426	0.0434	0.386	0.4547	0.0341	0.042
	357			hypotaurine	GC/MS	590	C00519	HMDB00965	107812		1.82	1.37	0.85	0.76	0.47	0.62	0.39	0.75	0.54	1.93	1.38	0.72	2.55	0.55	1.39	1.61		0.0604	0.0814	0.3465	0.2474	0.9009	0.2986	0.3091	0.8003	0.0475	0.0241	0.2891	0.1838	0.0173	0.0466	0.3495	0.2285	0.0636	0.0602	0.1103	0.2275	0.5181	0.3403
	366		Urea cycle; Arginine and Proline Metabolism	arginine	LC/MS neg	1638	C00062	HMDB00517	232		0.91	0.87	0.65	0.95	0.72	0.75	0.83	0.88	0.54	1.05	0.64	0.61	1.13	1.04	1.15	0.93		0.3626	0.2287	0.1867	0.1486	0.0009	0.0008	0.6641	0.8879	0.0063	0.0044	0.0159	0.0186	0.0838	0.1516	0.2667	0.1913	2.3401e-05	8.8628e-05	0.4984	0.4962	0.001	0.0026
	369			ornithine	GC/MS	1493	C00077	HMDB03374	6262		1.05	0.99	0.75	0.94	0.72	0.76	0.73	0.8	0.75	1.09	1.02	0.94	1.18	0.83	0.95	1.17		0.8066	0.3582	0.9263	0.4409	0.1328	0.0604	0.7361	0.9029	0.0855	0.0393	0.1557	0.1152	0.1233	0.1891	0.2638	0.1913	0.166	0.1297	0.6456	0.5496	0.863	0.4958
	370			proline	LC/MS pos	1898	C00148	HMDB00162	145742		1.12	1.12	0.74	0.99	0.66	0.67	0.73	0.72	1.02	0.98	1.39	1.42	1.31	0.86	0.84	1.8		0.2615	0.1943	0.3117	0.2277	0.0137	0.0086	0.9066	0.9401	0.0012	0.001	0.0015	0.0024	0.0075	0.0226	0.0065	0.0161	0.8807	0.4931	0.9496	0.6809	0.0054	0.0093
	371			citrulline	LC/MS pos	2132	C00327	HMDB00904	9750		0.53	0.47	0.69	0.89	1.31	1.47	0.57	0.33	0.44	0.57	0.78	1.36	1.96	2.12	1.36	1.26		1.8447e-05	0.0001	2.9082e-06	2.0715e-05	0.0032	0.0025	0.3253	0.8148	0.0222	0.0129	0.0027	0.0038	8.1838e-05	0.0006	1.9229e-08	2.3643e-07	1.4783e-06	8.764e-06	0.0001	0.0021	0.045	0.0521
	372			argininosuccinate	GC/MS	15497	C03406	HMDB00052	16950;828		0.67	0.86	0.52	1.28	0.79	0.61	0.88	0.38	0.26	0.44	0.29	0.67	1.63	2.15	0.73	0.8		0.6305	0.3211	0.8706	0.4243	0.4082	0.159	0.5212	0.8477	0.7243	0.2213	0.3252	0.2011	0.6455	0.5105	0.0241	0.0414	0.0055	0.0079	0.0601	0.1874	0.0147	0.0209
	388			trans-4-hydroxyproline	GC/MS	1366	C01157	HMDB00725	5810		0.95	0.8	0.44	0.84	0.46	0.55	0.85	1.08	0.98	1.28	1.15	0.9	1.23	1.09	1.66	2.71		0.7777	0.3568	0.0997	0.0944	1.891e-05	2.874e-05	0.1636	0.7965	3.2731e-05	5.6778e-05	0.0006	0.0012	0.2377	0.2796	0.5316	0.2952	0.9012	0.4963	0.0805	0.2173	0.2874	0.2145
	396		Creatine Metabolism	creatine	LC/MS pos	27718	C00300	HMDB00064	586		1.25	1.12	0.74	0.9	0.6	0.67	1.25	1.08	0.9	0.86	0.72	0.83	0.95	0.96	0.92	1.15		0.0642	0.0851	0.3139	0.2277	0.0222	0.0134	0.3573	0.8244	0.0003	0.0004	0.0025	0.0036	0.0777	0.1426	0.5065	0.2831	0.3778	0.2521	0.2454	0.3561	0.013	0.0193
	397			creatinine	LC/MS pos	513	C00791	HMDB00562	588		1.11	1.06	0.52	0.96	0.47	0.49	1.26	1.23	0.97	0.97	0.77	0.79	0.78	0.88	0.9	1.45		0.4	0.2427	0.6383	0.3657	0.0001	0.0001	0.705	0.8931	2.1856e-05	4.0727e-05	4.5944e-05	0.0001	0.0968	0.1584	0.1042	0.1031	0.9209	0.4984	0.9675	0.6826	0.0806	0.08
	403		Polyamine Metabolism	agmatine	GC/MS	15496	C00179	HMDB01432	199		3.17	3.54	1.58	1.12	0.5	0.45	1.71	1.03	1.52	0.61	0.89	1.47	1.87	1.01	0.55	1.8		0.5437	0.29	0.5403	0.3284	0.5005	0.189	0.9959	0.943	0.9459	0.2677	0.95	0.4586	0.766	0.5523	0.6716	0.349	0.4167	0.2709	0.8989	0.6616	0.6027	0.3781
	406			putrescine	GC/MS	1408	C00134	HMDB01414	1045		1.51	0.87	0.27	0.58	0.18	0.31	2.58	1.35	0.79	0.53	0.31	0.59	0.59	1.02	0.93	1.75		0.0267	0.0481	0.4101	0.286	9.0715e-07	2.4577e-06	0.0047	0.1167	2.2631e-08	1.1063e-07	3.8744e-06	2.0573e-05	5.7194e-05	0.0004	0.0874	0.0941	0.2037	0.1538	0.0024	0.0267	4.7432e-06	5.3892e-05
	407			spermine	LC/MS pos	603	C00750	HMDB01256	1103		1.97	2.26	1.62	1.15	0.82	0.71	3.86	2.94	1.28	0.76	0.33	0.44	0.46	0.91	0.6	0.37		0.0091	0.0212	0.0062	0.0152	0.0519	0.0274	0.86	0.9207	0.3987	0.1395	0.311	0.1944	2.051e-05	0.0002	0.0002	0.0009	0.3377	0.2315	0.2515	0.3577	0.0001	0.0006
	409			spermidine	LC/MS pos	485	C00315	HMDB01257	1102		1.79	1.77	0.68	0.99	0.38	0.39	5.65	4.17	1.47	0.74	0.26	0.35	0.27	0.85	0.64	0.58		0.0283	0.0489	0.0452	0.0608	0.1262	0.0591	0.8142	0.9125	0.001	0.0009	0.0016	0.0025	1.5541e-06	3.1376e-05	1.4398e-05	8.2616e-05	0.1243	0.108	0.2307	0.3499	2.9401e-05	0.0002
	410			5-methylthioadenosine (MTA)	LC/MS pos	1419	C00170	HMDB01173	439176		1.07	1.08	0.92	1.01	0.86	0.85	1.23	0.92	1.19	0.74	0.97	1.3	0.96	1.11	0.82	1.24		0.4335	0.2531	0.4186	0.2888	0.3545	0.1389	0.9789	0.943	0.098	0.0436	0.0934	0.0796	0.02	0.0515	0.3625	0.2328	0.0468	0.0467	0.0028	0.0267	0.6734	0.4051
	422		Glutathione Metabolism	glutathione, reduced (GSH)	LC/MS pos	2127	C00051	HMDB00125	124886		0.43	0.45	0.33	1.04	0.77	0.75	0.72	0.61	0.28	0.86	0.39	0.46	0.81	1.35	1.12	0.69		1.897e-08	3.2022e-07	3.3041e-08	4.9543e-07	3.901e-10	4.0668e-09	0.6939	0.8931	0.0059	0.0042	0.0025	0.0036	0.0008	0.0039	2.0524e-05	0.0001	4.6826e-11	2.3596e-09	0.0837	0.2173	4.3345e-09	2.2162e-07
	423			glutathione, oxidized (GSSG)	LC/MS pos	27727	C00127	HMDB03337	65359		0.38	0.31	0.35	0.8	0.91	1.13	0.73	0.46	0.37	0.63	0.5	0.8	0.65	1.25	0.98	0.69		0.0002	0.0006	2.7238e-05	0.0001	4.8168e-05	6.3862e-05	0.3752	0.8314	0.5453	0.1756	0.7723	0.3979	0.1332	0.1993	0.0013	0.0045	0.0002	0.0003	0.0346	0.1521	0.0044	0.0079
	425			cysteine-glutathione disulfide	LC/MS pos	35159		HMDB00656	4247235		0.88	0.92	1.24	1.04	1.4	1.35	0.83	0.58	1	0.7	1.2	1.72	1.23	1.16	0.78	0.99		0.5243	0.2841	0.561	0.3342	0.3112	0.1251	0.9551	0.943	0.1091	0.0477	0.1206	0.0939	0.3612	0.3528	0.0121	0.0281	0.9347	0.4984	0.0771	0.2173	0.3214	0.2364
	428			cysteinylglycine	GC/MS	35637	C01419	HMDB00078	439498		0.5	0.43	0.37	0.87	0.74	0.86	0.85	0.55	0.32	0.64	0.37	0.58	0.69	1.18	0.87	0.59		0.0002	0.0006	1.6698e-05	9.3894e-05	3.1777e-06	7.0718e-06	0.2764	0.7965	0.0584	0.0291	0.3756	0.2291	0.2877	0.3178	0.0007	0.0027	4.8729e-07	3.274e-06	0.007	0.0511	3.1024e-06	4.5321e-05
	430			5-oxoproline	LC/MS neg	1494	C01879	HMDB00267	7405		1.31	1.26	0.53	0.96	0.41	0.42	1.1	0.87	0.81	0.79	0.74	0.94	1.33	1.11	0.91	2.02		0.0044	0.012	0.0124	0.0232	7.73e-07	2.1895e-06	0.6245	0.887	6.2027e-09	4.1694e-08	1.1907e-08	1.7913e-07	0.2971	0.3185	0.1152	0.1102	0.0234	0.0265	0.0144	0.0793	0.0025	0.005
	431			ophthalmate	LC/MS pos	34592		HMDB05765	7018721		1.68	1.81	0.64	1.08	0.38	0.35	0.86	0.96	0.73	1.12	0.85	0.76	1.97	1.01	1.04	2.27		0.0001	0.0004	2.6132e-05	0.0001	0.0005	0.0004	0.482	0.8425	5.7035e-08	2.5559e-07	2.0705e-08	2.3362e-07	0.1591	0.2283	0.6711	0.349	0.0079	0.0108	0.3118	0.4073	0.1396	0.1286
	438	Peptide	Gamma-glutamyl Amino Acid	gamma-glutamylalanine	LC/MS pos	37063		HMDB29142	440103		2.19	2.52	1.04	1.15	0.47	0.41	1.01	1.43	1.99	1.41	1.96	1.4	1.82	0.84	1.03	3.48		7.5236e-06	4.6003e-05	9.7899e-07	8.007e-06	0.7577	0.2653	0.2595	0.7965	1.3424e-05	3.1387e-05	1.6621e-06	1.0002e-05	0.9375	0.6189	0.0099	0.0238	3.913e-05	0.0001	0.0117	0.0736	4.5691e-05	0.0002
	439			gamma-glutamylcysteine	LC/MS pos	1778	C00669	HMDB01049	842		1.17	1.14	0.51	0.98	0.44	0.45	0.73	0.73	0.42	1	0.58	0.58	1.74	1.09	1.12	1.44		0.308	0.2093	0.5127	0.3262	0.0004	0.0004	0.7065	0.8931	4.3986e-05	7.3917e-05	9.3751e-05	0.0002	0.0482	0.1042	0.0564	0.0684	2.9685e-05	9.466e-05	0.935	0.6778	0.0023	0.0049
	444			gamma-glutamylisoleucine*	LC/MS pos	34456		HMDB11170	14253342		1.14	1.11	0.81	0.97	0.7	0.73	0.85	0.78	0.46	0.92	0.54	0.59	2.55	1.89	1.78	1.45		0.3365	0.2175	0.552	0.3333	0.1278	0.0594	0.7066	0.8931	0.0195	0.0115	0.0417	0.0409	0.2502	0.2887	0.0708	0.0802	2.5845e-05	8.982e-05	0.4688	0.4962	0.0003	0.001
	445			gamma-glutamylleucine	LC/MS pos	18369		HMDB11171	151023		1.78	1.61	0.61	0.9	0.34	0.38	0.76	0.72	0.29	0.95	0.38	0.4	4.13	1.76	1.85	1.97		5.5103e-06	3.65e-05	5.3397e-05	0.0002	3.3073e-05	4.5797e-05	0.2451	0.7965	1.3494e-09	1.2094e-08	5.9425e-09	1.0728e-07	0.0057	0.0193	0.0017	0.0058	1.7387e-10	4.3807e-09	0.5797	0.5193	7.0745e-09	2.4114e-07
	450			gamma-glutamylthreonine*	LC/MS pos	33364		HMDB29159			1.49	1.3	0.28	0.87	0.19	0.21	0.82	0.74	0.44	0.9	0.53	0.59	2.56	1.41	1.47	4.04		0.004	0.0113	0.0435	0.0594	1.4197e-08	7.372e-08	0.2595	0.7965	2.5285e-10	4.5323e-09	9.279e-10	2.094e-08	0.1114	0.1752	0.0295	0.0434	4.8607e-06	2.3328e-05	0.4909	0.4962	0.0001	0.0005
	453			gamma-glutamylvaline	LC/MS pos	32393		HMDB11172	7015683		1.7	1.68	0.39	0.99	0.23	0.23	0.86	0.76	0.43	0.88	0.5	0.57	3.5	1.76	1.57	3.87		0.0001	0.0005	0.0001	0.0006	8.9237e-08	3.7071e-07	0.9154	0.9413	1.6655e-10	4.478e-09	1.8651e-10	9.4176e-09	0.1677	0.2283	0.019	0.037	4.5834e-07	3.274e-06	0.2614	0.3669	5.3562e-06	5.4771e-05
	595		Dipeptide	glycylleucine	LC/MS pos	34398	C02155	HMDB00759	92843		0.46	0.95	0.91	2.07	1.99	0.96	1.31	1.21	1.52	0.93	1.16	1.25	0.58	1.64	0.73	0.96		0.0436	0.0667	0.8333	0.4202	0.9739	0.3177	0.0286	0.3258	0.0409	0.0216	0.8588	0.4298	0.4783	0.4292	0.4799	0.2754	0.1626	0.1287	0.9978	0.6836	0.4712	0.3158
	878	Carbohydrate	Glycolysis, Gluconeogenesis, and Pyruvate Metabolism	glucose	GC/MS	20488	C00031	HMDB00122	79025		0.44	0.39	0.53	0.89	1.19	1.34	0.58	0.33	0.31	0.57	0.54	0.95	0.73	0.96	0.61	0.43		0.0459	0.0689	0.0224	0.0379	0.1328	0.0604	0.7202	0.8977	0.57	0.1825	0.3589	0.2204	0.1028	0.1638	0.0148	0.0318	0.0188	0.0229	0.3314	0.4216	0.3904	0.2745
	879			glucose 6-phosphate	GC/MS	31260	C00668	HMDB01401	5958		0.8	0.46	0.19	0.57	0.24	0.41	0.59	0.43	0.29	0.74	0.49	0.67	1.06	0.78	1	1.63		0.2032	0.1708	0.0004	0.0013	6.3235e-08	2.8145e-07	0.0058	0.1167	4.8189e-07	1.851e-06	0.0002	0.0004	0.0076	0.0226	0.0002	0.001	3.5912e-06	1.8689e-05	0.1205	0.231	0.0014	0.0034
	885			Isobar: fructose 1,6-diphosphate, glucose 1,6-diphosphate, myo-inositol 1,4 or 1,3-diphosphate	LC/MS neg	36984					0.84	0.92	0.31	1.1	0.37	0.34	1.08	1.46	0.96	1.35	0.89	0.66	0.78	1	1.23	2.4		0.2038	0.1708	0.5655	0.3347	2.2828e-07	7.9025e-07	0.4711	0.8425	1.9937e-06	5.9563e-06	5.7986e-07	5.0586e-06	0.5544	0.466	0.0158	0.0323	0.7861	0.4558	0.0523	0.177	0.392	0.2745
	887			dihydroxyacetone phosphate (DHAP)	GC/MS	15522	C00111	HMDB01473	668		0.72	0.6	0.18	0.83	0.25	0.3	0.59	0.49	0.37	0.83	0.63	0.75	1.13	0.93	0.93	2.31		0.1663	0.1662	0.0415	0.0574	1.2199e-06	3.0406e-06	0.4548	0.8425	1.6158e-05	3.4756e-05	7.0931e-05	0.0002	0.0342	0.0796	0.0038	0.0105	0.0005	0.001	0.3017	0.4024	0.0624	0.0671
	891			2-phosphoglycerate	GC/MS	35629	C00631	HMDB03391	59		0.68	1.05	0.76	1.54	1.13	0.73	0.46	0.46	0.59	1.01	1.28	1.27	2.44	1.65	1.08	1.88		0.5188	0.2841	0.9127	0.4368	0.6803	0.245	0.4519	0.8425	0.8133	0.239	0.6027	0.3317	0.0905	0.1584	0.0916	0.095	0.1494	0.1223	0.9948	0.6836	0.7778	0.4493
	892			3-phosphoglycerate	GC/MS	40264	C00597	HMDB00807	724		0.85	0.79	0.75	0.94	0.88	0.94	0.69	0.61	0.82	0.88	1.18	1.35	1.12	0.92	0.86	1.24		0.2964	0.2056	0.2083	0.1615	0.1303	0.0601	0.8197	0.9125	0.6133	0.194	0.7802	0.3979	0.095	0.1584	0.0283	0.0434	0.3576	0.2435	0.5336	0.5029	0.4203	0.2884
	895			lactate	GC/MS	527	C00186	HMDB00190	612		0.87	0.9	0.52	1.04	0.6	0.58	0.75	0.73	0.62	0.97	0.82	0.85	1.16	1.01	0.94	1.37		0.2866	0.204	0.3951	0.2777	7.7668e-05	9.877e-05	0.8222	0.9125	0.0007	0.0008	0.0005	0.0009	0.0256	0.0621	0.0205	0.037	0.0012	0.0021	0.9139	0.6661	0.1635	0.1417
	901		Pentose Phosphate Pathway	6-phosphogluconate	LC/MS neg	15442	C00345	HMDB01316	91493		1	1	1	1	1	1	1	1	1	1	1	1	1	1	1	1		1	0.4119	1	0.4661	1	0.3229	1	0.943	1	0.2786	1	0.4677	1	0.6277	1	0.446	1	0.5222	1	0.6836	1	0.5298
	903			ribose 5-phosphate	GC/MS	561	C00117	HMDB01548			1.38	1.18	0.64	0.86	0.46	0.54	1	0.66	0.68	0.66	0.68	1.03	1.41	1.02	0.79	1.5		0.093	0.1087	0.4279	0.291	0.0184	0.0114	0.345	0.8231	0.0004	0.0005	0.0034	0.0046	0.9969	0.6277	0.0256	0.0424	0.0459	0.0463	0.0258	0.1195	0.0463	0.0523
	908			ribulose/xylulose 5-phosphate	GC/MS	37288	C00199				0.83	0.78	0.5	0.94	0.6	0.64	0.94	0.44	0.56	0.47	0.59	1.27	1.11	1.25	0.62	1.24		0.436	0.2531	0.1666	0.1362	0.0047	0.0035	0.5248	0.8477	0.0245	0.014	0.0857	0.0744	0.8449	0.5832	0.0027	0.0076	0.0233	0.0265	0.004	0.0333	0.0347	0.0422
	912		Pentose Metabolism	ribose	GC/MS	12083	C00121	HMDB00283	5779		0.84	1.05	0.46	1.24	0.54	0.44	1.01	0.86	0.67	0.84	0.66	0.78	1.01	1.23	0.83	1.5		0.7287	0.3449	0.9516	0.4506	0.1065	0.0517	0.6839	0.8891	0.1935	0.0776	0.0954	0.0805	0.5578	0.466	0.8989	0.418	0.3128	0.2174	0.645	0.5496	0.6633	0.4014
	913			ribitol	GC/MS	15772	C00474	HMDB00508	6912		1.23	1.25	0.69	1.01	0.55	0.55	1.22	1.17	0.63	0.96	0.52	0.54	1.13	1.12	1.06	1.04		0.1248	0.1378	0.1158	0.1086	0.029	0.0169	0.9663	0.943	0.001	0.0009	0.0009	0.0016	0.1962	0.2426	0.2636	0.1913	0.0089	0.0118	0.8517	0.6514	0.0005	0.0017
	919			xylitol	GC/MS	4966	C00379	HMDB02917	6912		1.13	0.91	0.74	0.81	0.66	0.81	1.08	0.78	0.86	0.72	0.8	1.11	1.09	1.05	0.93	1.28		0.2809	0.204	0.5853	0.3431	0.0403	0.0226	0.1138	0.6927	0.0041	0.0031	0.1134	0.0918	0.6524	0.5105	0.0641	0.0735	0.2631	0.188	0.0263	0.1195	0.125	0.1173
	920			arabinose	GC/MS	575	C00216	HMDB00646	66308		1.42	0.83	0.78	0.59	0.55	0.94	0.82	0.66	0.94	0.8	1.14	1.43	1.08	0.62	0.86	1.29		0.5137	0.2841	0.4619	0.3078	0.4924	0.1871	0.1743	0.7965	0.1894	0.0766	0.9598	0.4608	0.8473	0.5832	0.7932	0.3879	0.667	0.3954	0.9444	0.6809	0.535	0.3485
	925			arabitol	GC/MS	38075	C01904	HMDB00568	94154		1.35	1.68	0.51	1.24	0.38	0.3	1.99	2.49	1.34	1.25	0.67	0.54	0.75	1.1	1.1	1.94		0.4657	0.2663	0.1522	0.1298	0.2797	0.1147	0.4606	0.8425	0.0805	0.0373	0.0185	0.0209	0.164	0.2283	0.0903	0.0948	0.6798	0.4007	0.7354	0.5845	0.3145	0.233
	984		Fructose, Mannose and Galactose Metabolism	fructose	GC/MS	577	C00095	HMDB00660	5984		0.47	0.46	0.99	0.97	2.1	2.16	0.67	0.49	0.33	0.73	0.48	0.67	1.03	1.46	1.09	0.34		0.0028	0.0083	0.0015	0.0045	0.9912	0.3217	0.7798	0.9125	0.0028	0.0021	0.0015	0.0024	0.0954	0.1584	0.0049	0.0127	7.3403e-05	0.0002	0.1546	0.2794	0.0029	0.0056
	985			fructose 1-phosphate	GC/MS	15909	C01094	HMDB01076	65246		0.24	0.16	0.16	0.66	0.66	1	2.49	1.84	1	0.74	0.4	0.54	0.16	1.64	1.84	1		0.0009	0.0031	0.0002	0.0006	0.0002	0.0002	0.3995	0.8425	0.3995	0.1395	1	0.4677	0.0465	0.1024	0.2586	0.1913	1	0.5222	0.3388	0.4216	0.0465	0.0523
	987			sorbitol	GC/MS	15053	C00794	HMDB00247	5780		1.01	0.72	0.17	0.72	0.17	0.24	0.78	0.59	0.33	0.76	0.42	0.55	1.72	1.33	1.41	3.32		0.8877	0.3814	0.1177	0.1092	1.0438e-07	4.0653e-07	0.0912	0.6917	8.4359e-08	3.4896e-07	1.4519e-06	9.3612e-06	0.1627	0.2283	0.0151	0.0318	2.9192e-05	9.466e-05	0.2271	0.3484	0.0006	0.0017
	991			mannose-6-phosphate	GC/MS	1470	C00275	HMDB01078	439198		1.08	1	0.39	0.93	0.36	0.39	0.37	0.62	0.57	1.66	1.52	0.92	1.28	0.44	0.79	1.85		0.7784	0.3568	0.8658	0.4243	0.0055	0.004	0.6531	0.8879	0.003	0.0023	0.0079	0.0097	0.0056	0.0193	0.1653	0.1395	0.0955	0.0851	0.101	0.2182	0.174	0.1483
	999			galactose	GC/MS	12055	C01582	HMDB00143	3037556		1.17	1	0.43	0.86	0.37	0.43	0.94	0.5	0.56	0.54	0.6	1.12	1.47	1.17	0.74	1.93		0.6833	0.3339	0.8713	0.4243	0.0195	0.0119	0.5699	0.8507	0.0083	0.0056	0.0271	0.0288	0.8409	0.5832	0.0385	0.0525	0.1339	0.1134	0.057	0.1833	0.1881	0.1551
	1013		Nucleotide Sugar	UDP-glucose	GC/MS	32344	C00029	HMDB00286	8629		0.44	0.73	0.49	1.64	1.11	0.68	0.47	0.48	0.49	1.01	1.04	1.04	0.94	1.01	0.62	0.95		0.0208	0.0434	0.3422	0.2463	0.0299	0.0173	0.1323	0.7461	0.8575	0.2493	0.1796	0.1276	0.0561	0.1152	0.0391	0.0526	0.0587	0.0569	0.8541	0.6514	0.9813	0.5298
	1017			UDP-galactose	GC/MS	15860	C00052	HMDB00302	18068		0.42	0.47	0.43	1.13	1.04	0.92	0.71	0.59	0.59	0.83	0.83	1	0.82	1.38	1.03	1.11		0.0153	0.0338	0.0801	0.0828	0.0586	0.0304	0.41	0.8425	0.5073	0.1684	0.8689	0.4298	0.3124	0.3262	0.169	0.1399	0.1463	0.1208	0.6964	0.5742	0.635	0.3888
	1018			UDP-glucuronate	LC/MS neg	2763	C00167	HMDB00935	17473		0.36	0.42	0.45	1.15	1.24	1.08	0.6	0.56	0.82	0.92	1.36	1.47	0.61	1.01	0.81	1.11		1.0548e-07	1.0481e-06	7.1818e-07	6.4613e-06	2.4214e-06	5.5882e-06	0.2383	0.7965	0.0696	0.0337	0.4822	0.2808	0.0004	0.0022	0.0001	0.0005	0.1057	0.0934	0.5083	0.4962	0.0145	0.0209
	1024			UDP-N-acetylglucosamine/galactosamine	LC/MS neg	38673					0.46	0.57	0.78	1.23	1.71	1.39	0.44	0.35	0.77	0.8	1.77	2.2	1.12	1.07	0.7	1.1		2.7826e-05	0.0001	0.0005	0.0018	0.0855	0.0426	0.1578	0.7965	0.0011	0.001	0.0251	0.0269	1.3935e-05	0.0002	8.9787e-07	7.7279e-06	0.0839	0.0762	0.1395	0.2593	0.0005	0.0017
	1035		Aminosugar Metabolism	glucuronate	GC/MS	15443	C00191	HMDB00127	444791		1.02	1.08	0.83	1.05	0.81	0.77	1.55	1.21	1.68	0.78	1.08	1.38	0.71	1.08	0.8	1.44		0.8498	0.3753	0.7617	0.4153	0.2681	0.1106	0.9091	0.9401	0.199	0.0793	0.1648	0.1199	0.0164	0.0451	0.2197	0.1719	0.0045	0.0066	0.1795	0.3094	0.5432	0.3516
	1038			N-acetylglucosamine	GC/MS	15095	C00140	HMDB00215	24139		0.63	0.95	0.73	1.5	1.15	0.77	0.57	0.41	0.37	0.72	0.65	0.91	2.39	2.14	1.02	1.21		0.3674	0.23	0.827	0.4202	0.3516	0.1387	0.4907	0.8425	0.9749	0.2731	0.4716	0.2782	0.1765	0.229	0.0595	0.0702	0.0632	0.0602	0.5479	0.5086	0.5684	0.3655
	1039			N-acetylglucosamine 6-phosphate	GC/MS	15107	C00357	HMDB02817	439219		1	4.57	3.27	4.57	3.27	0.72	0.37	0.37	1.56	1	4.26	4.26	2.73	1	0.22	1.3		1	0.4119	0.2539	0.1952	0.3375	0.1348	0.2539	0.7965	0.3375	0.121	0.8481	0.4277	0.3942	0.3778	0.3942	0.2406	0.5214	0.3243	1	0.6836	0.1452	0.1326
	1046			N-acetylneuraminate	LC/MS pos	32377	C00270	HMDB00230	439197		1.68	1.72	1.5	1.02	0.89	0.87	1.85	2.39	1.5	1.3	0.81	0.63	0.74	0.81	1.03	0.74		3.0811e-05	0.0002	2.2671e-05	0.0001	0.0004	0.0004	0.8747	0.931	0.2104	0.082	0.1623	0.1191	5.9803e-06	8.0494e-05	5.5628e-08	5.9849e-07	0.0004	0.0008	0.0106	0.0702	0.0429	0.0505
	1058			erythronate*	GC/MS	33477		HMDB00613	2781043		1.08	1.24	0.9	1.15	0.84	0.73	1.19	1.08	0.99	0.9	0.83	0.92	0.96	1.06	0.83	1.05		0.6519	0.3239	0.2734	0.2049	0.6319	0.2303	0.5095	0.8477	0.3572	0.1272	0.1242	0.0958	0.2938	0.3178	0.4904	0.2792	0.8328	0.4742	0.7093	0.5813	0.3968	0.276
	1065	Energy	TCA Cycle	citrate	GC/MS	1564	C00158	HMDB00094	311		0.76	0.35	0.49	0.46	0.65	1.42	2.45	0.69	0.81	0.28	0.33	1.17	0.31	1.01	0.61	0.51		0.08	0.0996	5.486e-06	3.2904e-05	0.0005	0.0005	0.0002	0.0112	0.0263	0.0149	0.0324	0.0326	4.3782e-05	0.0003	0.0399	0.0528	0.2266	0.1679	7.8304e-07	3.4436e-05	4.1935e-06	5.3602e-05
	1071			alpha-ketoglutarate	GC/MS	33453	C00026	HMDB00208	51		0.93	0.39	0.56	0.41	0.6	1.45	2.34	1.29	1.05	0.55	0.45	0.81	0.55	1.38	1.84	1.03		0.6997	0.335	0.0593	0.0711	0.2221	0.0942	0.121	0.7103	0.3931	0.1391	0.4582	0.2739	0.1696	0.2283	0.6652	0.349	0.9347	0.4984	0.3334	0.4216	0.1942	0.1589
	1074			succinate	GC/MS	1437	C00042	HMDB00254	1110		0.98	1.19	0.95	1.21	0.97	0.8	0.86	0.89	0.97	1.03	1.13	1.1	1.22	1.07	0.91	1.25		0.8844	0.3814	0.1472	0.1286	0.624	0.2287	0.1142	0.6927	0.7293	0.2216	0.0601	0.0554	0.1754	0.229	0.3021	0.2047	0.8793	0.4931	0.7299	0.5845	0.2245	0.178
	1075			fumarate	GC/MS	1643	C00122	HMDB00134	444972		1.14	1.4	0.63	1.23	0.55	0.45	1.4	1.28	1.18	0.91	0.84	0.92	0.83	1.03	0.76	1.56		0.3731	0.2306	0.0301	0.0479	0.0032	0.0025	0.1626	0.7965	0.0005	0.0005	2.5259e-05	9.5002e-05	0.0249	0.0616	0.0893	0.0948	0.2444	0.176	0.5149	0.4962	0.2235	0.178
	1076			malate	GC/MS	1303	C00149	HMDB00156	525		1.11	1.42	0.6	1.28	0.54	0.43	1.42	1.21	1	0.85	0.7	0.83	0.86	1.1	0.73	1.42		0.3742	0.2306	0.0065	0.0155	0.0003	0.0003	0.042	0.4019	5.022e-05	7.5017e-05	9.1868e-07	6.379e-06	0.0073	0.0226	0.1007	0.1007	0.9873	0.5209	0.2033	0.3231	0.0076	0.0121
	1090		Oxidative Phosphorylation	phosphate	GC/MS	11438	C00009	HMDB01429	1061		0.89	0.87	0.57	0.97	0.65	0.66	1	0.9	0.71	0.9	0.71	0.78	0.91	1.02	0.95	1.12		0.4143	0.2476	0.2946	0.2182	0.0008	0.0007	0.8093	0.9125	0.0046	0.0034	0.0077	0.0096	0.9951	0.6277	0.5023	0.2826	0.0211	0.0254	0.5061	0.4962	0.0214	0.0291
	1103	Lipid	Long Chain Fatty Acid	myristoleate (14:1n5)	LC/MS neg	32418	C08322	HMDB02000	5281119		0.92	1.05	0.64	1.14	0.7	0.62	0.91	0.78	0.89	0.86	0.98	1.14	0.96	0.95	0.72	1.33		0.8732	0.3814	0.8804	0.4259	0.1932	0.0848	0.7568	0.9125	0.2491	0.0957	0.1503	0.1121	0.5231	0.4463	0.4932	0.2792	0.4899	0.3086	0.9619	0.6823	0.9577	0.5298
	1106			palmitoleate (16:1n7)	LC/MS neg	33447	C08362	HMDB03229	445638		0.94	1.04	1.49	1.1	1.59	1.44	1.3	1.06	1.55	0.81	1.19	1.47	0.81	1.12	0.82	0.84		0.6489	0.3239	0.8566	0.4243	0.0393	0.0222	0.5264	0.8477	0.0155	0.0095	0.0559	0.0531	0.1473	0.2176	0.6746	0.349	0.0172	0.0212	0.2896	0.3939	0.2737	0.2089
	1109			10-heptadecenoate (17:1n7)	LC/MS neg	33971		HMDB60038	5312435		0.85	0.81	0.88	0.95	1.02	1.08	0.99	0.73	0.86	0.74	0.87	1.18	0.93	1.08	0.84	0.92		0.1715	0.1662	0.078	0.0828	0.2119	0.0904	0.6579	0.8879	0.8973	0.257	0.5685	0.3187	0.8988	0.6082	0.013	0.0294	0.2045	0.1538	0.0169	0.0858	0.25	0.1967
	1110			stearate (18:0)	LC/MS neg	1358	C01530	HMDB00827	5281		0.88	0.82	0.77	0.93	0.88	0.94	0.87	0.77	0.77	0.89	0.89	1	1.02	1	0.96	1.01		0.2495	0.1943	0.0815	0.0828	0.0232	0.0139	0.5161	0.8477	0.2071	0.0813	0.5244	0.3015	0.1834	0.2314	0.0262	0.0425	0.0231	0.0265	0.305	0.4024	0.2787	0.2111
	1112			oleate (18:1n9)	GC/MS	1359	C00712	HMDB00207	445639		0.83	0.86	0.97	1.03	1.17	1.14	0.93	0.96	1.08	1.04	1.17	1.13	0.88	0.98	0.99	0.98		0.0572	0.0811	0.0826	0.0828	0.7755	0.2688	0.8458	0.917	0.0976	0.0436	0.1379	0.1046	0.4042	0.3825	0.6728	0.349	0.3988	0.2643	0.6754	0.5639	0.104	0.1005
	1119			10-nonadecenoate (19:1n9)	LC/MS neg	33972		HMDB13622	5312513		0.74	0.8	0.59	1.09	0.8	0.74	0.87	0.72	0.66	0.82	0.75	0.92	1.03	1.23	0.93	1.15		0.0473	0.0696	0.1335	0.1212	0.0014	0.0012	0.5778	0.8507	0.1046	0.0461	0.036	0.0357	0.3302	0.3333	0.0291	0.0434	0.0075	0.0104	0.183	0.3095	0.0563	0.0613
	1124			eicosenoate (20:1)	LC/MS neg	33587		HMDB02231	5282768		1.02	1.02	1.37	1	1.34	1.33	0.94	0.91	1.21	0.97	1.29	1.33	1.05	0.96	0.93	0.93		0.7953	0.3568	0.7446	0.411	0.0468	0.0256	0.9469	0.943	0.077	0.036	0.0871	0.0749	0.6769	0.515	0.4399	0.2576	0.2959	0.2085	0.718	0.5845	0.1518	0.135
	1129			erucate (22:1n9)	LC/MS neg	1552	C08316	HMDB02068	5281116		0.91	0.97	1.53	1.06	1.69	1.59	0.87	1.06	1.14	1.21	1.31	1.08	0.93	0.9	1.02	0.69		0.4606	0.2653	0.7857	0.418	0.0057	0.0041	0.638	0.887	0.0012	0.001	0.0032	0.0044	0.2927	0.3178	0.7124	0.3628	0.2948	0.2085	0.1628	0.2902	0.0453	0.0521
	1141		Polyunsaturated Fatty Acid (n3 and n6)	docosapentaenoate (n3 DPA; 22:5n3)	LC/MS neg	32504	C16513	HMDB01976	6441454		0.91	0.78	0.62	0.86	0.68	0.8	1.22	0.93	0.78	0.76	0.63	0.84	0.86	1.16	1.03	1.08		0.5578	0.2956	0.1438	0.1269	0.0105	0.0068	0.362	0.8244	0.0353	0.0196	0.1924	0.1346	0.2878	0.3178	0.6745	0.349	0.1783	0.1372	0.1462	0.2679	0.0233	0.031
	1142			docosahexaenoate (DHA; 22:6n3)	LC/MS neg	19323	C06429	HMDB02183	445580		0.8	0.7	0.66	0.88	0.83	0.94	1.29	1.06	0.82	0.82	0.63	0.77	0.73	1.18	1.1	0.89		0.113	0.1283	0.0115	0.0225	0.0071	0.0049	0.2568	0.7965	0.1783	0.0726	0.8195	0.4156	0.0895	0.1584	0.6736	0.349	0.1581	0.1264	0.187	0.3122	0.0046	0.0082
	1146			linoleate (18:2n6)	LC/MS neg	1105	C01595	HMDB00673	5280450		0.79	0.79	1	0.99	1.26	1.27	1.07	0.88	1.34	0.82	1.25	1.52	0.76	1.03	0.84	1.02		0.0592	0.0811	0.0583	0.0711	0.9194	0.3031	0.9939	0.943	0.0717	0.0344	0.0707	0.0632	0.5858	0.4762	0.2724	0.1923	0.0275	0.0304	0.1099	0.2275	0.08	0.08
	1148			linolenate [alpha or gamma; (18:3n3 or 6)]	LC/MS neg	34035	C06426	HMDB03073	5280934		0.72	0.83	1.24	1.16	1.73	1.49	1.32	1.25	2.16	0.95	1.64	1.72	0.68	1.26	1.03	1.19		0.0332	0.0517	0.1943	0.1533	0.2035	0.0877	0.3436	0.8231	0.0021	0.0017	0.0164	0.019	0.0623	0.1217	0.1102	0.1066	6.9358e-05	0.0002	0.7581	0.5989	0.0044	0.0079
	1150			dihomo-linolenate (20:3n3 or n6)	LC/MS neg	35718	C03242	HMDB02925	5280581		0.85	0.72	0.5	0.85	0.59	0.7	1.13	0.86	0.45	0.77	0.4	0.52	0.95	1.27	1.14	0.86		0.2602	0.1943	0.0325	0.0479	0.0006	0.0005	0.2575	0.7965	0.0065	0.0045	0.0684	0.0617	0.4481	0.4112	0.3801	0.2378	0.0001	0.0003	0.1123	0.228	2.7274e-05	0.0002
	1151			arachidonate (20:4n6)	LC/MS neg	1110	C00219	HMDB01043	444899		0.77	0.57	0.51	0.74	0.66	0.89	1.45	1.01	0.67	0.7	0.46	0.66	0.69	1.31	1.23	0.91		0.1503	0.1593	0.0035	0.0093	0.0017	0.0014	0.0742	0.6137	0.0393	0.0211	0.7429	0.3899	0.058	0.1171	0.9178	0.418	0.048	0.047	0.0706	0.2117	0.0007	0.0021
	1154			docosadienoate (22:2n6)	LC/MS neg	32415	C16533	HMDB61714	5282807		0.9	0.89	1.42	0.99	1.58	1.59	1	0.68	1.05	0.68	1.05	1.55	1.24	1.38	0.94	0.92		0.6166	0.3162	0.5353	0.3284	0.0938	0.0464	0.9037	0.9401	0.0358	0.0196	0.028	0.0294	0.9591	0.6246	0.0471	0.0588	0.9232	0.4984	0.0426	0.1618	0.964	0.5298
	1155			dihomo-linoleate (20:2n6)	LC/MS neg	17805	C16525	HMDB05060	6439848		1	1.23	1.4	1.23	1.41	1.14	1.03	1.02	1.88	0.99	1.82	1.84	1.11	1.15	0.92	1.48		0.9283	0.3912	0.0825	0.0828	0.0085	0.0056	0.0974	0.6927	0.0103	0.0067	0.2686	0.1732	0.8109	0.5678	0.9078	0.418	7.4597e-05	0.0002	0.9017	0.6616	0.0001	0.0005
	1157			mead acid (20:3n9)	LC/MS neg	35174		HMDB10378	5312531		0.76	0.73	1.87	0.96	2.45	2.55	1.42	1.27	2.88	0.89	2.02	2.27	0.69	1.29	1.2	1.07		0.1555	0.1626	0.0518	0.0676	0.004	0.0031	0.5501	0.8507	0.0002	0.0002	5.2918e-05	0.0002	0.0685	0.1311	0.1975	0.1589	2.0647e-05	8.6702e-05	0.5514	0.5086	0.0011	0.0028
	1326		Fatty Acid Metabolism(Acyl Carnitine)	acetylcarnitine	LC/MS pos	32198	C02571	HMDB00201	1		0.84	0.94	0.73	1.12	0.87	0.78	1.1	0.73	0.59	0.67	0.53	0.8	1.21	1.59	0.95	0.98		0.5211	0.2841	0.9986	0.4661	0.1984	0.0865	0.52	0.8477	0.5027	0.1679	0.1978	0.1363	0.6638	0.515	0.1872	0.1524	0.0351	0.0369	0.0874	0.2173	0.0144	0.0209
	1353		Carnitine Metabolism	deoxycarnitine	LC/MS pos	36747	C01181	HMDB01161	134		0.81	0.84	0.79	1.04	0.98	0.94	0.79	0.66	0.51	0.84	0.65	0.77	1.1	1.07	0.87	0.71		0.29	0.204	0.4205	0.2888	0.2421	0.1019	0.7926	0.9125	0.9057	0.2577	0.7033	0.3734	0.245	0.2853	0.0481	0.0592	0.003	0.0046	0.3647	0.4415	0.036	0.0433
	1354			carnitine	LC/MS pos	15500	C00318	HMDB00062	10917		1.12	0.61	0.49	0.54	0.44	0.81	1.96	1.6	1.26	0.81	0.64	0.79	0.69	1.22	1.82	1.77		0.5048	0.2826	0.1527	0.1298	0.0511	0.0272	0.0442	0.4023	0.0131	0.0081	0.5527	0.3118	0.0211	0.0531	0.1191	0.1116	0.4158	0.2709	0.3756	0.4465	0.1042	0.1005
	1512		Inositol Metabolism	myo-inositol	GC/MS	19934	C00137	HMDB00211	892		1.1	0.93	0.21	0.85	0.19	0.22	0.96	1.06	0.56	1.11	0.58	0.53	0.58	0.5	0.66	1.58		0.5931	0.3082	0.8142	0.4202	1.6874e-05	2.6286e-05	0.4444	0.8425	6.1673e-06	1.7455e-05	2.6564e-05	9.5913e-05	0.7794	0.5587	0.7732	0.3803	0.0301	0.0326	0.5714	0.5193	0.0525	0.0583
	1515			scyllo-inositol	GC/MS	32379	C06153	HMDB06088	892		0.94	0.62	0.25	0.66	0.27	0.41	1.09	0.91	0.57	0.83	0.52	0.63	0.68	0.79	1	1.55		0.8747	0.3814	0.0813	0.0828	0.0062	0.0044	0.1084	0.6927	0.0086	0.0057	0.2152	0.1439	0.6152	0.4968	0.8557	0.4085	0.2435	0.176	0.4955	0.4962	0.1041	0.1005
	1520			inositol 1-phosphate (I1P)	GC/MS	1481	C04006	HMDB00213	440194		1.25	1.31	1.17	1.05	0.94	0.89	1.21	1	0.94	0.83	0.78	0.94	0.99	0.96	0.76	0.8		0.1717	0.1662	0.0798	0.0828	0.2841	0.1157	0.6657	0.8879	0.7513	0.2246	0.4568	0.2739	0.1671	0.2283	0.8638	0.4085	0.631	0.3831	0.2212	0.3434	0.0706	0.0729
	1521			inositol 2-phosphate (I2P)	GC/MS	27725	C01177	HMDB01313			1.8	1.38	2.19	0.77	1.21	1.58	1.63	1.83	1.59	1.12	0.98	0.87	1.07	0.97	1.42	0.78		0.1301	0.1417	0.6381	0.3657	0.0751	0.0378	0.2808	0.7965	0.7623	0.2265	0.1737	0.1254	0.1684	0.2283	0.1205	0.1116	0.201	0.1535	0.8462	0.6514	0.9144	0.5137
	1540		Phospholipid Metabolism	choline	LC/MS pos	15506	C00114	HMDB00097	305		0.4	0.3	0.48	0.74	1.21	1.63	0.28	0.22	0.26	0.79	0.93	1.18	0.9	0.63	0.67	0.48		3.3356e-07	2.946e-06	8.2031e-09	1.845e-07	6.7256e-06	1.27e-05	0.0201	0.2618	0.0957	0.0432	0.0005	0.001	5.2092e-09	2.1034e-07	3.8785e-10	1.5896e-08	2.2962e-09	3.306e-08	0.0429	0.1618	0.5192	0.3403
	1541			choline phosphate	LC/MS pos	34396	C00588	HMDB01565	1014		1.13	1.08	0.42	0.95	0.37	0.39	1.42	1.21	0.61	0.85	0.43	0.51	0.76	0.96	0.85	1.12		0.2323	0.1865	0.4702	0.311	1.1241e-07	4.1202e-07	0.6226	0.887	1.9053e-08	1.0246e-07	3.8273e-08	3.8387e-07	0.0022	0.0085	0.0631	0.0734	0.0002	0.0003	0.118	0.231	2.2244e-07	5.6866e-06
	1542			cytidine 5'-diphosphocholine	LC/MS pos	34418	C00307	HMDB01413	13804		0.88	0.93	0.82	1.06	0.93	0.88	0.44	0.25	0.32	0.57	0.72	1.26	2.53	1.27	0.68	0.98		0.2516	0.1943	0.4941	0.3221	0.0681	0.0348	0.6309	0.887	0.4542	0.1556	0.2269	0.1483	9.7975e-07	2.3737e-05	8.447e-10	1.8176e-08	1.2093e-08	1.5234e-07	0.0001	0.002	0.0094	0.0148
	1543			glycerophosphorylcholine (GPC)	LC/MS pos	15990	C00670	HMDB00086	71920		0.34	0.14	0.23	0.42	0.69	1.64	0.28	0.1	0.15	0.37	0.55	1.47	1.07	0.88	0.79	0.71		1.2054e-08	3.1939e-07	1.803e-12	1.6217e-10	1.5468e-10	3.2129e-09	2.181e-07	3.9694e-05	0.0019	0.0016	0.0002	0.0004	1.1764e-09	7.1254e-08	2.03e-13	1.7488e-11	3.92e-12	3.9506e-10	4.586e-08	5.4634e-06	2.8393e-05	0.0002
	1546			ethanolamine	GC/MS	34285	C00189	HMDB00149	700		0.84	0.73	1.09	0.87	1.3	1.49	1.17	0.94	1.28	0.8	1.09	1.37	0.87	1.22	1.11	1.02		0.2602	0.1943	0.0613	0.0726	0.6358	0.2303	0.4105	0.8425	0.1184	0.0511	0.0239	0.026	0.327	0.3333	0.7375	0.3669	0.1528	0.1232	0.1951	0.3178	0.6309	0.3886
	1547			phosphoethanolamine	GC/MS	12102	C00346	HMDB00224	1015		1.09	1.08	0.95	0.99	0.87	0.88	1.89	2.56	1.35	1.35	0.71	0.53	0.58	1.01	1.38	0.82		0.6412	0.3226	0.6543	0.3707	0.8807	0.2966	0.9853	0.943	0.5392	0.1751	0.5512	0.3118	0.0035	0.0131	9.3422e-05	0.0004	0.1382	0.116	0.1008	0.2182	0.0805	0.08
	1548			cytidine-5'-diphosphoethanolamine	LC/MS pos	34410	C00570	HMDB01564	123727		0.71	0.77	0.53	1.08	0.74	0.69	0.4	0.45	0.5	1.11	1.23	1.11	1.63	0.92	0.94	1.52		0.0254	0.0477	0.0757	0.0828	0.0002	0.0003	0.5796	0.8507	0.0396	0.0211	0.0127	0.0153	3.0721e-06	5.3165e-05	1.4346e-05	8.2616e-05	7.0524e-05	0.0002	0.408	0.4694	0.1131	0.1081
	1748		Lysolipid	1-palmitoyl-GPC (16:0)	LC/MS neg	33955		HMDB10382	86554		0.75	0.77	0.65	1.03	0.87	0.84	1.12	0.84	0.75	0.75	0.67	0.89	0.77	1.15	0.84	0.88		0.0703	0.0916	0.0846	0.0828	0.0068	0.0047	0.9211	0.9418	0.2614	0.0997	0.224	0.1476	0.4389	0.4059	0.2169	0.1713	0.0477	0.047	0.054	0.1782	0.0096	0.0149
	1757			1-oleoyl-GPC (18:1)	LC/MS neg	33960		HMDB02815	16081932		0.72	0.71	0.7	0.98	0.97	0.99	0.99	0.8	0.94	0.81	0.95	1.17	0.77	1.06	0.88	1.04		0.0136	0.0308	0.0078	0.0166	0.0078	0.0053	0.7911	0.9125	0.7936	0.2345	0.9974	0.4677	0.9401	0.6189	0.0824	0.0909	0.6259	0.3823	0.0946	0.2173	0.6796	0.4064
	1787			1-palmitoyl-GPE (16:0)	LC/MS neg	35631		HMDB11503	9547069		0.92	1.25	1.47	1.35	1.59	1.18	1.05	1.27	1.14	1.21	1.09	0.9	0.82	0.93	0.83	0.64		0.7753	0.3568	0.5402	0.3284	0.1109	0.0532	0.3732	0.8314	0.0654	0.032	0.3042	0.192	0.8868	0.6035	0.3379	0.2237	0.644	0.3887	0.4115	0.4694	0.7484	0.4413
	1790			1-stearoyl-GPE (18:0)	LC/MS neg	34416		HMDB11130	9547068		1	1.62	1.31	1.61	1.3	0.81	1.59	1.32	1.69	0.83	1.07	1.28	0.7	1.11	0.57	0.91		0.9997	0.4119	0.5583	0.3342	0.5115	0.192	0.558	0.8507	0.5113	0.1687	0.9423	0.4573	0.1522	0.2221	0.3841	0.2378	0.1188	0.1041	0.5513	0.5086	0.8865	0.5036
	1792			1-oleoyl-GPE (18:1)	LC/MS neg	35628		HMDB11506	9547071		0.96	0.83	1.88	0.87	1.95	2.26	1.15	0.92	1.5	0.8	1.3	1.64	0.8	0.95	0.88	0.64		0.8857	0.3814	0.5075	0.3262	0.0505	0.0271	0.602	0.8766	0.0381	0.0207	0.013	0.0155	0.5711	0.4706	0.9774	0.4405	0.1746	0.1354	0.5902	0.5226	0.4121	0.2847
	1800			1-arachidonoyl-GPE (20:4n6)*	LC/MS neg	35186		HMDB11517	42607465		0.68	0.82	0.49	1.2	0.72	0.6	1.39	0.89	0.62	0.64	0.45	0.7	0.96	1.95	1.03	1.21		0.3334	0.2172	0.7809	0.418	0.0344	0.0196	0.4852	0.8425	0.2069	0.0813	0.0593	0.0554	0.1752	0.229	0.7255	0.3652	0.0867	0.078	0.0947	0.2173	0.0051	0.0088
	1810			1-palmitoyl-GPI (16:0)*	LC/MS neg	35305		HMDB61695			1.55	2	1.08	1.29	0.7	0.54	1.01	1.85	2.37	1.84	2.34	1.28	1.24	0.81	1.15	2.71		0.1708	0.1662	0.0085	0.0178	0.7471	0.263	0.1371	0.7461	0.2852	0.1065	0.0167	0.0191	0.979	0.6277	0.0133	0.0294	0.0016	0.0026	0.0126	0.0746	0.0015	0.0035
	1813			1-stearoyl-GPI (18:0)	LC/MS neg	19324		HMDB61696			1	1.42	0.73	1.41	0.73	0.52	1.47	1.49	2.01	1.01	1.37	1.35	0.9	1.31	0.94	2.45		0.9045	0.3865	0.012	0.023	0.0273	0.0161	0.0154	0.234	0.0214	0.0125	7.7657e-05	0.0002	0.007	0.0223	0.005	0.0127	4.8968e-05	0.0001	0.8775	0.6616	0.0288	0.0372
	1815			1-oleoyl-GPI (18:1)*	LC/MS neg	36602					1.08	1.43	1.5	1.33	1.39	1.05	1.61	1.28	2.5	0.79	1.55	1.96	0.86	1.29	0.77	1.43		0.4889	0.2776	0.0042	0.0109	0.0013	0.0011	0.0185	0.2594	0.0058	0.0041	0.5808	0.3236	0.0003	0.0015	0.0288	0.0434	1.3308e-07	1.2193e-06	0.0391	0.1562	0.0006	0.0018
	1823			1-stearoyl-GPS (18:0)*	LC/MS neg	45966			9547101		0.74	0.85	0.77	1.14	1.03	0.9	1.1	1.26	1.6	1.14	1.45	1.28	0.95	1.41	1.41	2		0.1892	0.1708	0.5185	0.3262	0.2574	0.1077	0.4874	0.8425	0.8465	0.2474	0.6142	0.3342	0.6321	0.5055	0.2616	0.1913	0.0255	0.0285	0.5088	0.4962	0.0657	0.0686
	1881		Lysoplasmalogen	1-(1-enyl-palmitoyl)-GPE (P-16:0)*	LC/MS neg	39270					1.22	1.16	2.11	0.96	1.74	1.81	1.08	1.27	2.17	1.18	2.01	1.71	0.61	0.54	0.67	0.63		0.6931	0.3339	0.7018	0.3922	0.0571	0.0299	0.9905	0.943	0.1187	0.0511	0.1162	0.0918	0.6342	0.5055	0.4103	0.247	0.0736	0.0681	0.7232	0.5845	0.1721	0.1479
	1883			1-(1-enyl-oleoyl)-GPE (P-18:1)*	LC/MS neg	44621					1.03	1.2	1.69	1.16	1.64	1.41	1.35	1.31	2.11	0.97	1.56	1.61	0.59	0.77	0.64	0.73		0.9986	0.4119	0.8452	0.4224	0.0724	0.0367	0.8465	0.917	0.0726	0.0346	0.1038	0.086	0.2236	0.2735	0.2766	0.1923	0.0116	0.0152	0.8906	0.6616	0.1329	0.1235
	1885			1-(1-enyl-stearoyl)-GPE (P-18:0)*	LC/MS neg	39271					1.44	3.02	4.97	2.1	3.45	1.65	1.78	1.89	3.82	1.06	2.14	2.02	0.82	1.01	0.51	0.63		0.386	0.236	0.0679	0.0794	0.003	0.0024	0.302	0.7965	0.019	0.0113	0.1424	0.1071	0.179	0.229	0.1421	0.1261	0.0126	0.0162	0.8913	0.6616	0.179	0.1513
	1889		Glycerolipid Metabolism	glycerol 3-phosphate	GC/MS	15365	C00093	HMDB00126	754		0.41	0.23	0.24	0.57	0.6	1.05	0.34	0.18	0.17	0.52	0.51	0.98	1.19	0.98	0.89	0.84		4.2768e-06	3.0905e-05	5.8942e-09	1.7676e-07	1.1512e-08	6.5216e-08	0.0005	0.0179	0.0014	0.0012	0.6146	0.3342	4.1178e-07	1.2471e-05	5.5404e-10	1.5896e-08	4.6275e-10	9.3274e-09	0.0001	0.0022	0.0001	0.0005
	1894			glycerophosphoglycerol	GC/MS	48857	C03274		439964		1.76	1.49	2.9	0.85	1.65	1.95	0.88	0.54	1.31	0.61	1.49	2.43	1.99	0.99	0.72	0.9		0.2667	0.1963	0.7183	0.3989	0.0663	0.0342	0.4447	0.8425	0.4245	0.1463	0.1284	0.0982	0.677	0.515	0.2864	0.1956	0.9311	0.4984	0.5071	0.4962	0.6156	0.3838
	1907		Monoacylglycerol	1-oleoylglycerol (18:1)	GC/MS	21184		HMDB11567	5283468		1.04	1.22	0.98	1.18	0.95	0.8	1.03	1.01	1.04	0.98	1.01	1.02	1.6	1.59	1.33	1.69		0.799	0.3568	0.8228	0.4202	0.9417	0.3088	0.9755	0.943	0.7433	0.2246	0.7665	0.3977	0.9306	0.6189	0.9416	0.4265	0.9488	0.5033	0.8727	0.6616	0.9818	0.5298
	1908			2-oleoylglycerol (18:1)	GC/MS	35848			5319879		1.36	1.59	2.94	1.16	2.15	1.85	0.63	1.47	2.09	2.34	3.33	1.42	1.59	0.73	1.48	1.13		0.5679	0.2989	0.4334	0.291	0.0466	0.0256	0.8284	0.9134	0.1352	0.0568	0.1949	0.1353	0.4318	0.4024	0.3686	0.2333	0.0797	0.0731	0.1026	0.2182	0.0165	0.0231
	1913			2-arachidonoylglycerol (20:4)	GC/MS	19266	C13856	HMDB04666	5282280		0.85	0.75	0.61	0.88	0.72	0.82	0.7	1.11	0.86	1.58	1.22	0.77	0.72	0.6	1.07	1.01		0.5253	0.2841	0.1614	0.1344	0.0419	0.0233	0.4248	0.8425	0.1377	0.0574	0.4679	0.2779	0.095	0.1584	0.6378	0.3474	0.4204	0.2716	0.0385	0.1562	0.3575	0.2574
	1928		Diacylglycerol	1,2-dipalmitoylglycerol	GC/MS	11953		HMDB07098	99931		0.58	0.95	0.88	1.63	1.52	0.93	1.06	1.68	0.79	1.58	0.75	0.47	0.9	1.65	1.59	0.81		0.1815	0.168	0.8724	0.4243	0.7418	0.263	0.2351	0.7965	0.3041	0.1128	0.8655	0.4298	0.7571	0.5491	0.0968	0.0992	0.7152	0.4191	0.1666	0.2931	0.5024	0.3336
	1990		Sphingolipid Metabolism	palmitoyl sphingomyelin (d18:1/16:0)	GC/MS	37506			9939941		0.85	0.82	0.72	0.96	0.85	0.88	0.89	0.81	0.78	0.91	0.87	0.96	1.08	1.13	1.07	1.16		0.1979	0.1708	0.0883	0.0854	0.0114	0.0073	0.6433	0.887	0.1492	0.0617	0.3123	0.1944	0.2924	0.3178	0.0852	0.0928	0.0398	0.041	0.4664	0.4962	0.2675	0.2057
	1991			stearoyl sphingomyelin (d18:1/18:0)	GC/MS	19503	C00550	HMDB01348	6453725		0.43	0.61	0.67	1.41	1.55	1.1	0.73	1.29	1.15	1.76	1.57	0.89	1.01	1.7	2.13	1.73		0.221	0.1793	0.6551	0.3707	0.8985	0.2986	0.4251	0.8425	0.2695	0.1013	0.749	0.3908	0.4855	0.4293	0.6179	0.3388	0.8128	0.4679	0.2392	0.3561	0.3539	0.2567
	2016			N-palmitoyl-sphingosine (d18:1/16:0)	GC/MS	44877		HMDB04949	5283564		0.21	0.47	0.25	2.23	1.19	0.54	0.88	0.89	0.62	1.01	0.7	0.69	0.58	2.42	1.09	1.42		0.0001	0.0004	0.0115	0.0225	0.0003	0.0003	0.0392	0.3963	0.5861	0.1865	0.1104	0.0906	0.7327	0.5379	0.8261	0.4017	0.1634	0.1287	0.9027	0.6616	0.2821	0.2121
	2040		Sterol	lathosterol	GC/MS	39864	C01189	HMDB01170	65728		1.03	0.56	0.38	0.55	0.36	0.67	0.87	0.38	0.22	0.44	0.25	0.57	1.86	1.57	1.26	1.08		0.9212	0.3912	0.0729	0.0828	0.0015	0.0013	0.0604	0.5237	0.0012	0.001	0.0756	0.0669	0.5693	0.4706	0.0047	0.0125	5.1346e-05	0.0001	0.0157	0.0826	0.0002	0.0007
	2041			desmosterol	GC/MS	6065	C01802	HMDB02719	439577		0.64	0.39	0.1	0.6	0.15	0.25	1.02	0.52	0.11	0.51	0.11	0.21	1.05	1.67	1.43	1.21		0.0225	0.0447	4.7919e-05	0.0002	3.9158e-10	4.0668e-09	0.0088	0.1607	8.0128e-09	4.7877e-08	6.1644e-07	5.0586e-06	0.9529	0.624	0.002	0.0062	6.9372e-10	1.1652e-08	0.0018	0.0234	6.4812e-10	6.6275e-08
	2042			cholesterol	GC/MS	63	C00187	HMDB00067	11025495		0.97	0.86	0.97	0.89	1	1.13	0.97	0.88	0.91	0.9	0.94	1.04	0.84	0.84	0.85	0.79		0.7896	0.3568	0.1529	0.1298	0.8193	0.2805	0.2367	0.7965	0.9692	0.2729	0.2228	0.1476	0.7034	0.5196	0.1877	0.1524	0.365	0.2469	0.3375	0.4216	0.5934	0.3769
	2044			7-dehydrocholesterol	GC/MS	40398	C01164	HMDB00032	439423		0.56	0.36	0.28	0.64	0.5	0.78	0.61	0.33	0.09	0.55	0.15	0.28	2.09	2.27	1.93	0.68		0.0956	0.1101	0.0321	0.0479	0.0083	0.0055	0.5721	0.8507	0.2325	0.09	0.5161	0.2986	0.308	0.3244	0.0318	0.0449	0.0001	0.0003	0.2124	0.3336	0.0013	0.0032
	2055			7-ketocholesterol	GC/MS	34188		HMDB00501	91474		0.74	0.74	0.46	1.01	0.62	0.62	0.58	0.35	0.39	0.61	0.67	1.11	1.34	1.06	0.64	1.15		0.4362	0.2531	0.5873	0.3431	0.1737	0.0768	0.8097	0.9125	0.5406	0.1751	0.3971	0.2406	0.5049	0.4432	0.1002	0.1007	0.131	0.1128	0.3036	0.4024	0.3764	0.2692
	2057			cholestanol	GC/MS	21131	C12978	HMDB00908	6665		1.25	0.8	0.95	0.64	0.76	1.19	1.06	0.85	0.86	0.81	0.81	1.01	0.97	0.82	1.03	0.87		0.1756	0.1662	0.1978	0.1548	0.8419	0.2867	0.0139	0.2303	0.1248	0.0533	0.2707	0.1733	0.8109	0.5678	0.3504	0.2285	0.3088	0.2161	0.2456	0.3561	0.2139	0.1722
	2832	Nucleotide	Purine Metabolism, (Hypo)Xanthine/Inosine containing	inosine 5'-monophosphate (IMP)	LC/MS pos	2133	C00130	HMDB00175	8582		0.86	0.68	0.58	0.8	0.68	0.85	0.98	0.76	0.74	0.77	0.75	0.97	0.79	0.9	0.88	1		0.2878	0.204	0.0089	0.0181	0.0005	0.0005	0.0786	0.6221	0.0055	0.004	0.2026	0.1386	0.9946	0.6277	0.0446	0.0564	0.033	0.035	0.0452	0.1621	0.0334	0.0417
	2833			inosine	LC/MS neg	1123	C00294	HMDB00195	6021		5.41	5	1.65	0.92	0.3	0.33	2.53	0.5	0.89	0.2	0.35	1.78	1.97	0.92	0.2	1.06		8.9508e-08	1.0164e-06	1.6946e-07	2.1779e-06	0.0156	0.0097	0.6771	0.8879	7.7073e-06	1.9736e-05	1.6926e-05	6.945e-05	0.0001	0.0007	0.0007	0.0027	0.4853	0.3076	8.2822e-08	5.4634e-06	2.8496e-05	0.0002
	2834			hypoxanthine	LC/MS neg	3127	C00262	HMDB00157	790		7.55	8.09	5.61	1.07	0.74	0.69	3.15	0.9	3.19	0.29	1.01	3.55	2.1	0.88	0.23	1.19		7.7492e-07	6.1597e-06	5.2247e-07	5.8756e-06	5.6906e-06	1.1439e-05	0.8123	0.9125	0.2646	0.1002	0.1813	0.1279	0.0002	0.001	0.7463	0.3691	0.0002	0.0003	8.6286e-05	0.0019	0.9963	0.5298
	2843			allantoin	GC/MS	1107	C02350	HMDB00462	204		4.68	3.63	1.81	0.77	0.39	0.5	0.63	0.94	0.89	1.49	1.41	0.95	4.37	0.59	1.13	2.15		0.0294	0.0496	0.0574	0.0711	0.4382	0.1696	0.7347	0.9029	0.1297	0.0549	0.2284	0.1483	0.3437	0.3397	0.8794	0.4136	0.6663	0.3954	0.4234	0.4694	0.5991	0.3781
	2847		Purine Metabolism, Adenine containing	adenosine 5'-diphosphate (ADP)	LC/MS neg	3108	C00008	HMDB01341	6022		0.92	0.8	0.61	0.86	0.66	0.77	1.49	1.1	0.77	0.74	0.52	0.7	0.68	1.1	0.94	0.86		0.4986	0.2811	0.0502	0.0664	0.0002	0.0003	0.1733	0.7965	0.001	0.0009	0.0198	0.0221	0.0013	0.0056	0.3831	0.2378	0.0226	0.0265	0.0086	0.0597	8.5939e-06	7.3233e-05
	2848			adenosine 5'-monophosphate (AMP)	LC/MS pos	32342	C00020	HMDB00045	6083		0.77	0.67	0.55	0.87	0.71	0.82	0.91	0.89	0.75	0.98	0.82	0.84	0.78	0.91	1.03	1.06		0.0579	0.0811	0.0056	0.0139	0.0002	0.0002	0.2634	0.7965	0.0123	0.0078	0.1159	0.0918	0.453	0.4126	0.4233	0.2513	0.0379	0.0394	0.9587	0.6823	0.1548	0.1365
	2854			adenylosuccinate	LC/MS neg	18360	C03794	HMDB00536	195		1.11	1.14	0.69	1.03	0.62	0.61	1.08	0.76	0.73	0.71	0.67	0.95	1.03	1.01	0.69	1.08		0.5324	0.286	0.5173	0.3262	0.1071	0.0517	0.9812	0.943	0.0322	0.018	0.0307	0.0315	0.6695	0.515	0.2462	0.1892	0.1414	0.1178	0.1208	0.231	0.0649	0.0685
	2855			adenosine	LC/MS pos	555	C00212	HMDB00050	60961		1.01	0.94	1.36	0.93	1.35	1.46	0.89	0.7	0.96	0.79	1.08	1.37	1.14	1	0.85	0.8		0.9301	0.3912	0.4774	0.3135	0.0079	0.0053	0.4261	0.8425	0.0095	0.0063	0.0017	0.0026	0.2343	0.2784	0.002	0.0062	0.6572	0.3942	0.0257	0.1195	0.4446	0.3031
	2856			adenine	GC/MS	554	C00147	HMDB00034	190		1.15	1.05	0.86	0.92	0.75	0.82	0.9	0.79	0.9	0.87	1	1.15	1.45	1.14	1.09	1.53		0.2143	0.1756	0.673	0.3784	0.2042	0.0877	0.4007	0.8425	0.0187	0.0113	0.0986	0.0824	0.3285	0.3333	0.0412	0.0537	0.3685	0.2476	0.2429	0.3561	0.9351	0.5225
	2883		Purine Metabolism, Guanine containing	guanosine 5'- monophosphate (5'-GMP)	LC/MS pos	2849	C00144	HMDB01397	6804		0.85	0.78	0.78	0.92	0.91	0.99	0.83	0.86	0.81	1.04	0.97	0.93	0.92	0.9	1.02	0.96		0.0895	0.1063	0.0154	0.0277	0.0125	0.0079	0.3792	0.8314	0.3294	0.1189	0.9203	0.4515	0.0595	0.1181	0.1391	0.1247	0.032	0.0343	0.6434	0.5496	0.7526	0.4413
	2888			guanosine	LC/MS neg	1573	C00387	HMDB00133	6802		1.47	1.61	1.35	1.1	0.92	0.84	1.46	0.72	0.92	0.49	0.63	1.28	1.16	1.15	0.52	0.79		0.007	0.0169	0.0014	0.0044	0.0274	0.0161	0.4623	0.8425	0.5157	0.1691	0.1754	0.1257	0.0066	0.0216	0.0201	0.037	0.458	0.2921	3.2701e-05	0.0009	0.0013	0.0033
	2889			guanine	LC/MS pos	32352	C00242	HMDB00132	764		1.09	2.26	2.96	2.08	2.72	1.31	1.44	0.79	1.66	0.55	1.15	2.09	1.33	1.75	0.47	0.74		0.668	0.3298	0.0005	0.0018	1.9621e-05	2.9111e-05	0.0014	0.0412	4.5466e-05	7.4089e-05	0.1157	0.0918	0.0406	0.0911	0.2653	0.1913	0.0086	0.0116	0.0038	0.0333	0.4549	0.308
	2907		Pyrimidine Metabolism, Orotate containing	N-carbamoylaspartate	GC/MS	1594	C00438	HMDB00828	93072		2.13	2.89	0.62	1.36	0.29	0.22	1.99	1.86	3.23	0.94	1.63	1.73	0.76	0.71	0.49	3.93		0.0191	0.0411	0.0015	0.0045	0.1425	0.0639	0.2432	0.7965	0.0008	0.0008	6.3802e-05	0.0002	0.0196	0.0515	0.0298	0.0434	0.0006	0.0011	0.8374	0.6498	0.1149	0.1088
	2909			orotate	GC/MS	1505	C00295	HMDB00226	967		1.85	1.97	0.98	1.07	0.53	0.5	2.77	2.75	4.94	0.99	1.78	1.79	0.55	0.82	0.76	2.74		0.0014	0.0045	0.0007	0.0023	0.8878	0.2974	0.7392	0.9029	0.0019	0.0016	0.0009	0.0016	1.988e-05	0.0002	2.1236e-05	0.0001	6.4255e-08	6.4759e-07	0.9727	0.6826	0.0034	0.0065
	2917		Pyrimidine Metabolism, Uracil containing	uridine monophosphate (5' or 3')	LC/MS pos	39879		HMDB00288	6030		0.35	0.47	0.29	1.32	0.81	0.62	0.48	0.44	0.47	0.92	0.99	1.07	0.85	1.14	0.8	1.39		5.7066e-08	7.5601e-07	2.9933e-06	2.0715e-05	4.3648e-09	2.7198e-08	0.0244	0.2966	0.0749	0.0353	0.0005	0.0009	3.6769e-06	5.5676e-05	1.3798e-06	9.8963e-06	3.7088e-06	1.8689e-05	0.5791	0.5193	0.9962	0.5298
	2921			uridine	LC/MS neg	606	C00299	HMDB00296	6029		0.22	0.3	0.31	1.35	1.39	1.03	0.31	0.33	0.25	1.06	0.8	0.75	1.08	1.51	1.18	0.87		2.6428e-11	2.1007e-09	7.5289e-10	3.3867e-08	1.0509e-09	8.1853e-09	0.0051	0.1167	0.0028	0.0021	0.7759	0.3979	1.1061e-09	7.1254e-08	2.2658e-09	3.2504e-08	8.5333e-11	2.8667e-09	0.5551	0.5086	0.0309	0.0395
	2922			uracil	GC/MS	605	C00106	HMDB00300	1174		0.48	0.55	1.16	1.15	2.44	2.11	0.41	0.18	0.29	0.45	0.7	1.58	2.56	2.2	0.85	0.64		0.0057	0.0146	0.0196	0.034	0.4769	0.1823	0.5594	0.8507	0.0012	0.001	0.0043	0.0057	0.0016	0.0065	1.6695e-06	1.1053e-05	3.2899e-05	0.0001	0.0027	0.0267	0.076	0.0777
	2938			beta-alanine	GC/MS	55	C00099	HMDB00056	239		1.34	1.22	1.22	0.91	0.92	1.01	0.78	0.51	0.92	0.65	1.18	1.81	1.3	0.76	0.54	0.97		0.6897	0.3339	0.5258	0.3267	0.477	0.1823	0.8119	0.9125	0.7518	0.2246	0.9374	0.4573	0.3961	0.3778	0.2106	0.1678	0.8933	0.4946	0.6713	0.5639	0.4726	0.3158
	2944		Pyrimidine Metabolism, Cytidine containing	cytidine 5'-monophosphate (5'-CMP)	LC/MS pos	2372	C00055	HMDB00095	6131		0.32	0.45	0.32	1.43	1.03	0.72	0.64	0.56	0.64	0.87	0.99	1.15	0.65	1.32	0.8	1.27		5.9841e-11	2.3783e-09	1.2863e-08	2.3145e-07	8.916e-11	2.7779e-09	0.0002	0.0112	0.6945	0.2146	0.0006	0.0011	2.1892e-05	0.0002	8.9617e-07	7.7279e-06	2.379e-05	8.8628e-05	0.0915	0.2173	0.9657	0.5298
	2947			cytidine	LC/MS pos	514	C00475	HMDB00089	6175		0.29	0.39	0.57	1.33	1.95	1.46	0.48	0.23	0.31	0.49	0.64	1.32	1.33	2.18	0.8	0.72		2.0143e-08	3.2022e-07	6.7979e-07	6.4613e-06	0.0002	0.0003	0.032	0.3421	4.8688e-05	7.5017e-05	0.0062	0.0079	1.5958e-05	0.0002	1.8856e-09	3.2458e-08	2.9782e-08	3.3351e-07	1.8755e-05	0.0006	0.0014	0.0034
	2960		Pyrimidine Metabolism, Thymine containing	thymidine 5'-monophosphate	LC/MS neg	12023	C00364	HMDB01227	9700		1.02	1.09	0.54	1.06	0.53	0.5	1.24	1.32	0.63	1.07	0.5	0.47	1	1.2	1.21	1.15		0.6855	0.3339	0.363	0.2571	5.3895e-05	6.9966e-05	0.6075	0.8774	2.425e-05	4.3469e-05	9.0856e-06	4.5563e-05	0.0764	0.1423	0.0209	0.037	0.0005	0.0009	0.5142	0.4962	1.1109e-05	8.7383e-05
	2975	Cofactors and Vitamins	Nicotinate and Nicotinamide Metabolism	nicotinamide	LC/MS pos	594	C00153	HMDB01406	936		0.68	0.83	0.76	1.23	1.13	0.92	0.74	0.83	1.01	1.12	1.36	1.22	0.93	1.02	0.93	1.23		0.0064	0.016	0.1348	0.1212	0.0501	0.0271	0.1394	0.7461	0.3264	0.1186	0.5946	0.3293	0.0263	0.0624	0.1454	0.1273	0.9238	0.4984	0.3726	0.4465	0.0216	0.0291
	2977			nicotinamide ribonucleotide (NMN)	LC/MS pos	22152	C00455	HMDB00229	14180		1.6	1.51	1.97	0.94	1.23	1.31	2.29	1.77	2.19	0.77	0.96	1.24	0.66	0.94	0.77	0.73		0.0052	0.0137	0.018	0.0318	0.0003	0.0003	0.5553	0.8507	0.1734	0.0712	0.0596	0.0554	2.442e-05	0.0002	0.001	0.0034	4.5e-05	0.0001	0.0874	0.2173	0.7556	0.4413
	2979			nicotinamide adenine dinucleotide (NAD+)	LC/MS pos	5278	C00003	HMDB00902	5893		0.91	0.83	0.63	0.91	0.69	0.76	0.95	0.83	0.71	0.87	0.75	0.85	1.01	1.05	1	1.14		0.2844	0.204	0.0376	0.0536	2.8535e-05	4.0411e-05	0.2631	0.7965	0.0003	0.0003	0.0029	0.0041	0.5335	0.452	0.029	0.0434	0.0006	0.001	0.0972	0.2173	0.0022	0.0047
	2980			nicotinamide adenine dinucleotide reduced (NADH)	LC/MS neg	31475	C00004	HMDB01487	439153		0.83	0.67	0.63	0.8	0.76	0.95	0.53	0.35	0.44	0.65	0.83	1.27	1.71	1.1	0.89	1.19		0.1977	0.1708	0.0074	0.0162	0.0032	0.0025	0.1045	0.6927	0.0498	0.025	0.6937	0.3705	0.0004	0.0022	1.1967e-06	9.3633e-06	2.3511e-05	8.8628e-05	0.0065	0.0505	0.1619	0.1415
	2981			nicotinamide adenine dinucleotide phosphate (NADP+)	LC/MS pos	32380	C00006	HMDB00217	5886		0.87	1.02	1.09	1.18	1.25	1.06	1.16	1.4	1.62	1.21	1.4	1.16	0.85	1.14	1.17	1.28		0.2602	0.1943	0.836	0.4202	0.5186	0.1935	0.1873	0.7965	0.0864	0.0394	0.659	0.3562	0.3358	0.3362	0.0311	0.0447	0.0042	0.0062	0.1895	0.3125	0.0324	0.0409
	3000		Pantothenate and CoA Metabolism	pantothenate	LC/MS pos	1508	C00864	HMDB00210	6613		0.96	0.85	0.51	0.88	0.53	0.6	0.87	0.8	0.67	0.92	0.76	0.83	1.23	1.12	1.16	1.63		0.7289	0.3449	0.1427	0.1269	9.6185e-06	1.6649e-05	0.2518	0.7965	1.8578e-05	3.7001e-05	0.0002	0.0004	0.2345	0.2784	0.0579	0.0692	0.0019	0.003	0.4311	0.4708	0.0246	0.0323
	3002			phosphopantetheine	LC/MS neg	15504	C01134	HMDB01416	987		0.56	0.68	0.52	1.21	0.94	0.77	0.67	0.73	0.87	1.1	1.3	1.19	0.87	1.04	0.94	1.45		0.0002	0.0007	0.0069	0.016	9.2061e-05	0.0001	0.1096	0.6927	0.7054	0.2167	0.054	0.0519	0.0045	0.0165	0.0247	0.0417	0.234	0.1722	0.4213	0.4694	0.0553	0.0608
	3005			coenzyme A	LC/MS neg	2936	C00010	HMDB01423	317		1.06	1.03	0.67	0.97	0.63	0.65	1.2	1.43	1.17	1.2	0.98	0.82	0.79	0.89	1.1	1.39		0.5767	0.3016	0.7904	0.418	0.0009	0.0008	0.7684	0.9125	0.0003	0.0003	0.0005	0.001	0.1021	0.1638	0.0025	0.0075	0.1324	0.1131	0.084	0.2173	0.8839	0.5036
	3016		Tocopherol Metabolism	alpha-tocopherol	GC/MS	1561	C02477	HMDB01893	14985		1.07	1.04	1.19	0.98	1.12	1.14	1.99	1.64	3.14	0.82	1.58	1.92	0.58	1.09	0.92	1.54		0.7956	0.3568	0.9613	0.4528	0.6968	0.2495	0.8331	0.9134	0.8956	0.257	0.7328	0.3868	0.1925	0.2404	0.4356	0.2568	0.0219	0.026	0.5825	0.5193	0.256	0.1988
	3064		Thiamine Metabolism	thiamin (Vitamin B1)	LC/MS pos	5341	C00378	HMDB00235	1130		0.72	0.86	0.86	1.18	1.18	1	0.64	0.96	0.89	1.5	1.39	0.92	0.96	0.85	1.08	1		0.3247	0.2143	0.8089	0.4202	0.7831	0.2696	0.4524	0.8425	0.4723	0.1587	0.9732	0.4648	0.0559	0.1152	0.8506	0.4085	0.5885	0.3617	0.0799	0.2173	0.1507	0.135
	3076		Vitamin B6 Metabolism	pyridoxine (Vitamin B6)	LC/MS pos	608	C00314	HMDB02075	1054		0.73	0.79	0.44	1.08	0.6	0.55	0.69	0.71	0.65	1.04	0.95	0.92	0.95	0.89	0.86	1.43		0.0223	0.0447	0.0749	0.0828	6.4943e-06	1.2646e-05	0.5408	0.8507	0.001	0.0009	0.0003	0.0006	0.0089	0.0257	0.0165	0.0329	0.0046	0.0067	0.7709	0.6054	0.7596	0.4413
	3293	Xenobiotics	Food Component/Plant	gluconate	GC/MS	587	C00257	HMDB00625	10690		1.28	1.5	0.75	1.18	0.58	0.5	1.24	1.07	1.13	0.86	0.91	1.06	0.98	0.95	0.69	1.48		0.174	0.1662	0.0313	0.0479	0.1253	0.0591	0.3624	0.8244	0.0078	0.0053	0.0011	0.0018	0.3245	0.3333	0.7248	0.3652	0.541	0.3345	0.5197	0.4962	0.7003	0.4163
	4034		Chemical	phenol red	LC/MS neg	36817	C12600		4766		0.84	0.85	0.91	1.01	1.09	1.07	0.75	0.91	1.15	1.21	1.53	1.26	1.24	1.11	1.33	1.57		0.0736	0.0943	0.0932	0.0892	0.2614	0.1086	0.8982	0.9401	0.4638	0.1569	0.5436	0.3106	0.0055	0.0193	0.3135	0.2092	0.1505	0.1223	0.0455	0.1621	0.0002	0.0009
[truncated: 11 more columns]
